# Supplementary material for: Tetra-coordinated organoboron complexes with triaminoguanidine-salicylidene based ligands: aggregation induced enhanced emission and mechanoresponsive features
Source: Royal Society of Chemistry journal article supplement (doi:10.1039/d4dt03217a), 2025-01-01
Supplement: d4dt03217a1.pdf [file d4dt03217a1.pdf]

## Tetra-Coordinated Organoboron Complexes with Triaminoguanidine-Salicylidene based Ligands: Aggregation Induced Enhanced Emission and Mechanoresponsive Features

Balamurugan Tharmalingam,<sup>#a,b</sup> Rajendran Kishore Kumar,<sup>#a</sup> Ottoor Anitha,<sup>a</sup> Werner Kaminsky,<sup>c</sup> Jan Grzegorz Malecki,<sup>d</sup> Balasubramanian Murugesapandian<sup>a,\*</sup>

<sup>a</sup>Department of Chemistry, Bharathiar University, Coimbatore, 641046, Tamil Nadu, India. E-mail: [mpandian@gmail.com](mailto:mpandian@gmail.com); [bmurugesapandian@buc.edu.in](mailto:bmurugesapandian@buc.edu.in) Fax: +91-422-2422387; Tel: +91-422-2428312.

<sup>b</sup>State Key Laboratory of Fine Chemicals, Frontier Science Center for Smart Materials, School of Chemical Engineering, Dalian University of Technology, Dalian 116024 (P. R. China)

<sup>c</sup>Department of Chemistry, University of Washington, Seattle, WA 98195, USA.

<sup>d</sup> Institute of Chemistry, University of Silesia, Szkolna 9, 40-006 Katowice, Poland

# Equal contribution

### Table of Contents

|   |                                                                                                        |        |
|---|--------------------------------------------------------------------------------------------------------|--------|
| 1 | <b>Table S1.</b> Comparative table between previously reported organoboron AIE gen bearing ES IPT unit | S5, S6 |
| 2 | <b>Fig. S1.</b> <sup>1</sup> H NMR Spectrum of <b>6</b> in DMSO- <i>d</i> <sub>6</sub> .               | S7     |
| 3 | <b>Fig. S2.</b> <sup>13</sup> C NMR Spectrum of <b>6</b> in DMSO- <i>d</i> <sub>6</sub> .              | S8     |
| 4 | <b>Fig. S3.</b> <sup>11</sup> B NMR Spectrum of <b>6</b> in DMSO- <i>d</i> <sub>6</sub> .              | S8     |
| 5 | <b>Fig. S4.</b> The HRMS of compound <b>6</b> .                                                        | S9     |
| 6 | <b>Fig. S5.</b> <sup>1</sup> H NMR Spectrum of <b>7</b> in CDCl <sub>3</sub> .                         | S10    |
| 7 | <b>Fig. S6.</b> <sup>13</sup> C NMR Spectrum of <b>7</b> in DMSO- <i>d</i> <sub>6</sub> .              | S11    |
| 8 | <b>Fig. S7.</b> <sup>11</sup> B NMR Spectrum of <b>7</b> in CDCl <sub>3</sub> .                        | S11    |
| 9 | <b>Fig. S8.</b> The HRMS of compound <b>7</b> .                                                        | S12    |

|    |                                                                                                |     |
|----|------------------------------------------------------------------------------------------------|-----|
| 10 | <b>Fig. S9.</b> $^1\text{H}$ NMR Spectrum of <b>8</b> in $\text{DMSO-}d_6$                     | S13 |
| 11 | <b>Fig. S10.</b> $^{13}\text{C}$ NMR Spectrum of <b>8</b> in $\text{DMSO-}d_6$ .               | S13 |
| 12 | <b>Fig. S11.</b> $^{11}\text{B}$ NMR Spectrum of <b>8</b> in $\text{CDCl}_3$ .                 | S14 |
| 13 | <b>Fig. S12.</b> The HRMS of compound <b>8</b> .                                               | S15 |
| 14 | <b>Fig. S13.</b> $^1\text{H}$ NMR Spectrum of <b>9</b> in $\text{DMSO-}d_6$ .                  | S16 |
| 15 | <b>Fig. S14.</b> $^{13}\text{C}$ NMR Spectrum of <b>9</b> in $\text{DMSO-}d_6$ .               | S16 |
| 16 | <b>Fig. S15</b> $^{11}\text{B}$ NMR Spectrum of <b>9</b> in $\text{CDCl}_3$ .                  | S17 |
| 17 | <b>Fig. S16.</b> The HRMS of compound <b>9</b> .                                               | S18 |
| 18 | <b>Fig. S17.</b> $^1\text{H}$ NMR Spectrum of <b>10</b> in $\text{DMSO-}d_6$ .                 | S19 |
| 19 | <b>Fig. S18.</b> $^{13}\text{C}$ NMR Spectrum of <b>10</b> in $\text{DMSO-}d_6$ .              | S19 |
| 20 | <b>Fig. S19.</b> $^{11}\text{B}$ NMR Spectrum of <b>10</b> in $\text{DMSO-}d_6$ .              | S20 |
| 21 | <b>Fig. S20.</b> The HRMS of compound <b>10</b> .                                              | S21 |
| 22 | <b>Fig. S21</b> Two-dimensional chain like supramolecular network of <b>6</b> .                | S22 |
| 23 | <b>Fig. S22</b> Two-dimensional polymeric supramolecular network of <b>7</b> .                 | S22 |
| 24 | <b>Fig. S23</b> Two-dimensional polymeric supramolecular network of <b>8</b> .                 | S23 |
| 25 | <b>Fig. S24</b> Dimeric structure of compound <b>9</b> .                                       | S23 |
| 26 | <b>Fig. S25</b> Two-dimensional supramolecular network of <b>9</b> .                           | S24 |
| 27 | <b>Fig. S26</b> Two-dimensional chain like supramolecular network of <b>10</b> .               | S24 |
| 28 | <b>Fig. S27.</b> Absorption spectra of boron compounds <b>6-10 (A - E)</b> in various solvents | S25 |

|    |                                                                                                                                                                                                                                                                                     |     |
|----|-------------------------------------------------------------------------------------------------------------------------------------------------------------------------------------------------------------------------------------------------------------------------------------|-----|
|    | with different polarities at room temperature.                                                                                                                                                                                                                                      |     |
| 29 | <b>Fig. S28.</b> Enol form of selected frontier molecular orbital of organoboron complexes <b>6-10</b> based on optimized ground state geometry. Calculation was performed at B3LYP/6-31G(d) level with Gaussian 16.                                                                | S26 |
| 30 | <b>Fig. S29.</b> Keto form of selected frontier molecular orbital of organoboron complexes <b>6-10</b> based on optimized ground state geometry. Calculation was performed at B3LYP/6-31G(d) level with Gaussian 16.                                                                | S26 |
| 31 | <b>Table S2.</b> Selected bond lengths (Å) for [6-10] from X-ray and calculated structures using the B3LYP 6-31G method.                                                                                                                                                            | S27 |
| 32 | <b>Table S3.</b> Electronic transition for organoboron complexes 6-10 calculated using the B3LYP 6-31G method.                                                                                                                                                                      | S27 |
| 33 | <b>Table S4.</b> UV-visible absorption and emission spectra of <b>6-10</b> in different solvents at room temperature.                                                                                                                                                               | S28 |
| 34 | <b>Fig. S30.</b> (A) Emission spectra of <b>6</b> in different water fractions in THF and water mixture binary solvent; $\lambda_{\text{ex}} = 420$ nm. (B) Plots of emission intensity vs water fraction. (C) Fluorescent images in different water fractions (under UV light).    | S29 |
| 35 | <b>Fig. S31.</b> (A) Emission spectra of <b>7</b> in different water fractions in THF and water mixture binary solvent; $\lambda_{\text{ex}} = 420$ nm. (B) Plots of emission intensity vs water fraction. (C) Fluorescent images of in different water fractions (under UV light). | S30 |
| 36 | <b>Fig. S32.</b> (A) Emission spectra of <b>8</b> in different water fractions in THF and water mixture binary solvent; $\lambda_{\text{ex}} = 420$ nm. (B) Plots of emission intensity vs water fraction. (C) Fluorescent images of in different water fractions (under UV light). | S31 |
| 37 | <b>Fig. S33.</b> UV-visible absorption spectra of compounds <b>6-10 (A-E)</b> in THF-H <sub>2</sub> O (0-90 %) mixture with different water fractions.                                                                                                                              | S32 |
| 38 | <b>Fig. S34.</b> DLS images of compounds (6-10) with particle size distribution in THF-H <sub>2</sub> O mixture (A, B) <b>6</b> (60 & 90%), (C, D) <b>7</b> (70 & 90%), (E, F) <b>8</b> (50 & 70%), (G, H) <b>9</b> (70 & 90%) and (I, J) <b>10</b> (70 & 90%)                      | S33 |
| 39 | <b>Table S5.</b> Results from DLS for the complex <b>6-10</b> .                                                                                                                                                                                                                     | S34 |

|    |                                                                                                                                                                                                                                                       |          |
|----|-------------------------------------------------------------------------------------------------------------------------------------------------------------------------------------------------------------------------------------------------------|----------|
| 40 | <b>Fig. S35.</b> Emission spectra of <b>6 -10</b> in THF-H <sub>2</sub> O and THF-glycerol.                                                                                                                                                           | S34      |
| 41 | <b>Fig. S36.</b> (A). Images of the boron compounds ( <b>7 &amp; 8</b> ) under UV-lamp. (B) Solid state emission spectra of compounds ( <b>7 &amp; 8</b> ) crystals and ground samples.                                                               | S35      |
| 42 | <b>Fig. S37.</b> (A) Normalized spectrum of the compound <b>6</b> before and after grinding. (B) Normalized spectrum of the compound <b>9</b> before and after grinding. (C) Normalized spectrum of the compound <b>10</b> before and after grinding. | S36      |
| 43 | <b>Fig. S38.</b> SEM images of compounds <b>9 &amp;10</b> (A&B) before and (C&D) after grinding respectively.                                                                                                                                         | S36      |
| 44 | <b>Table S6.</b> Crystal parameters and structure refinement data for compound <b>6-10</b> .                                                                                                                                                          | S37, S38 |
| 45 | <b>References</b>                                                                                                                                                                                                                                     | S39      |

### Stock solution preparation for spectroscopic measurements

Stock solutions of  $1 \times 10^{-5}$  were prepared for the solvent effect studies of boron compounds 6-10. For aggregation studies, stock solutions of  $1 \times 10^{-4}$  were made using double-distilled ultrapure water and THF as solvents.

### Computation Details

DFT calculations were performed by using the Gaussian 16 package.<sup>1</sup> The ground state geometries were optimized using DFT at the B3LYP/6-31G(d). The electronic excited state energies of the compounds were calculated by time-dependent DFT (TDDFT) with B3LYP functional and 6-31G(d) basis set based on the optimized ground state geometry.

**Table S1.** Comparative table between previously reported organoboron AIE gen bearing ES IPT unit

| S.No.  | Compound                                                                                      | AIE with ES IPT | Reference |
|--------|-----------------------------------------------------------------------------------------------|-----------------|-----------|
| 1. (a) | 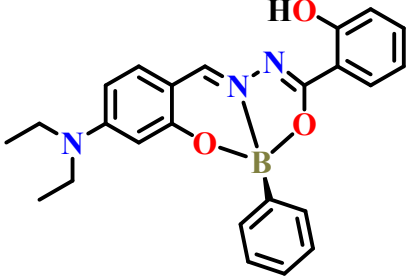 <p>DPDP</p> | AIE Only        | 2         |
| 1. (b) |  <p>DPDN</p> | AIE Only        |           |
| 2.     |            | AIE Only        | 3         |

|    |                                                                                                                                                                                                   |                        |   |
|----|---------------------------------------------------------------------------------------------------------------------------------------------------------------------------------------------------|------------------------|---|
| 3. | 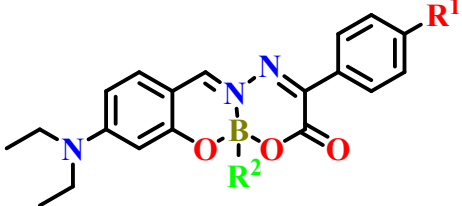 <p><math>R^1</math> - H, <math>CF_3</math>, CN, <math>NO_2</math><br/> <math>R^2</math>-<math>C_6H_5</math></p> | -                      | 4 |
| 4. |  <p><math>R' = H, Me, Et, iPr</math><br/> <math>R = H, CF_3</math></p>                                           | -                      | 5 |
| 5. |                                                                                                                | AIE Only               | 6 |
| 6. | This work                                                                                                                                                                                         | AIE with<br>ESIPT unit |   |

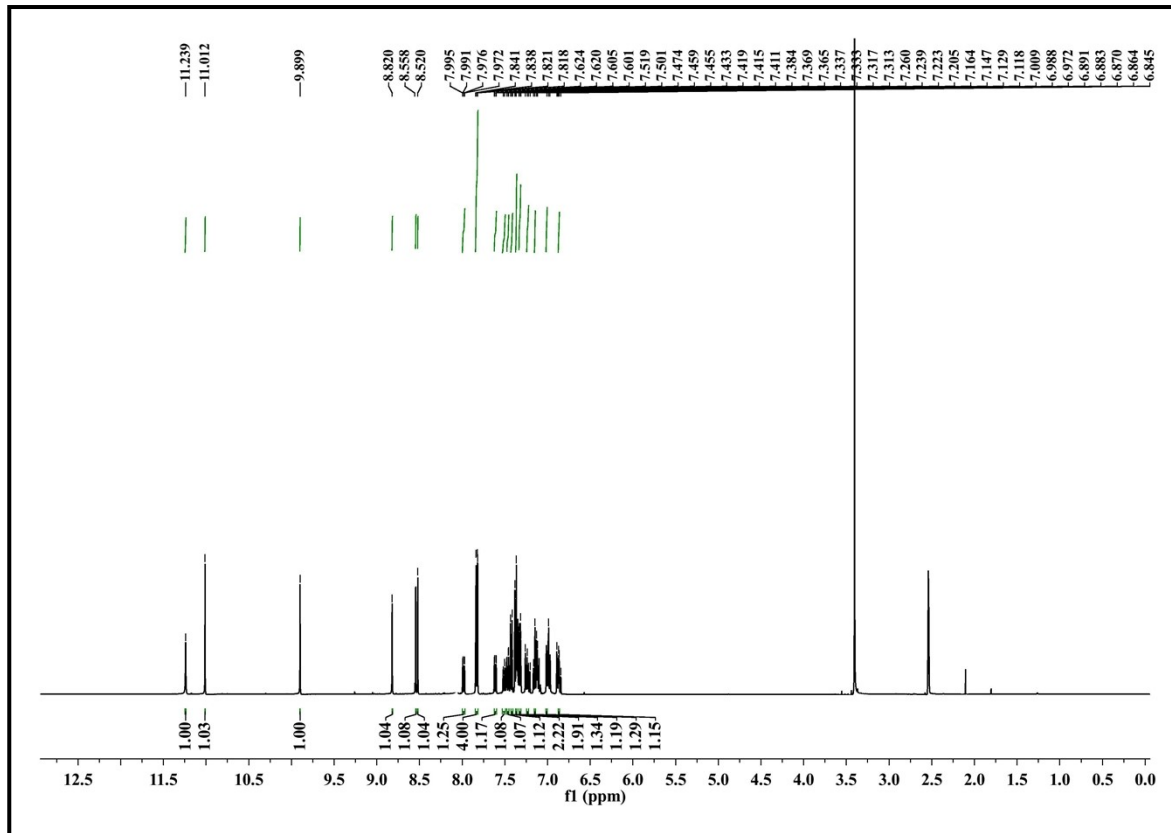

**Fig. S1.**  $^1\text{H}$  NMR Spectrum of **6** in  $\text{DMSO-}d_6$

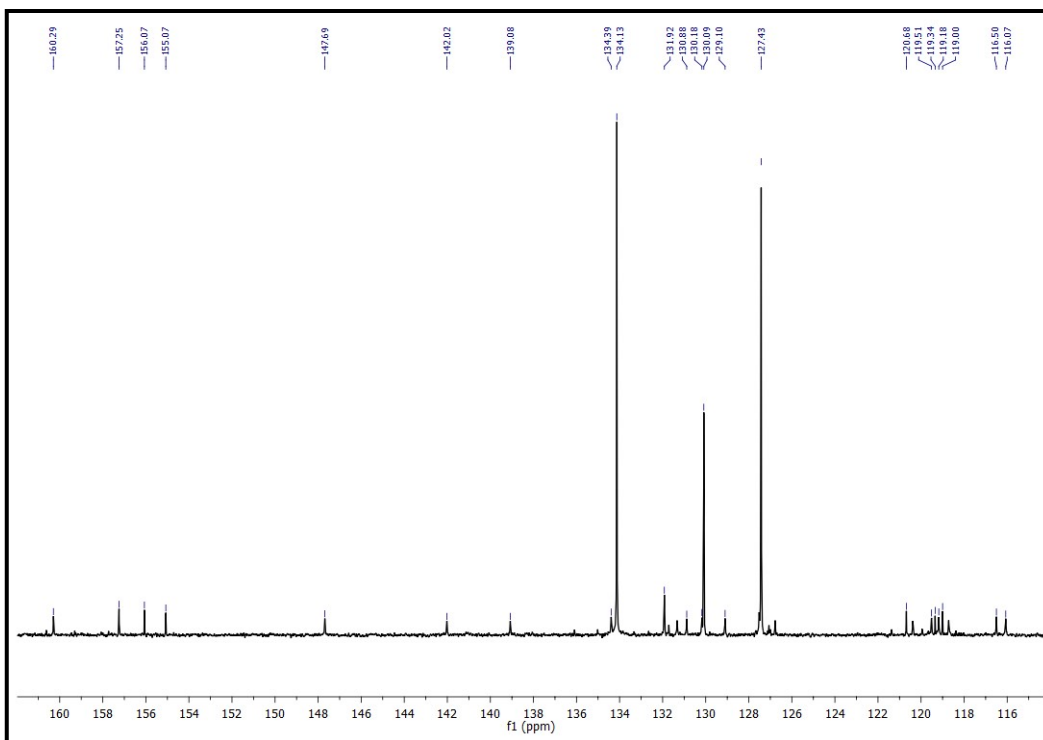

**Fig. S2.**  $^{13}\text{C}$  NMR Spectrum of **6** in  $\text{DMSO-}d_6$ .

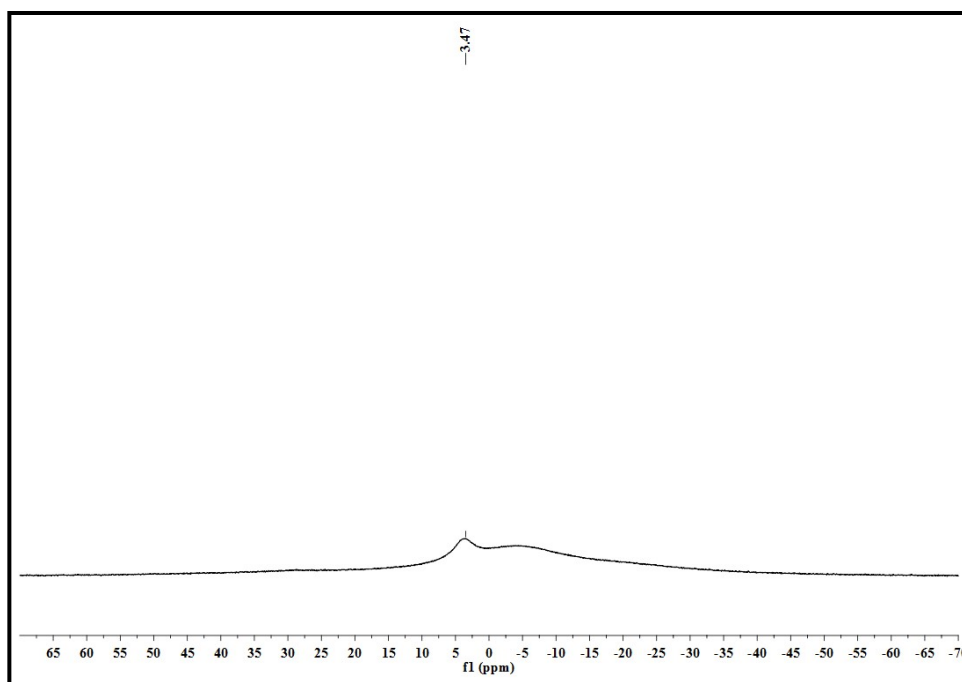

**Fig. S3.**  $^{11}\text{B}$  NMR Spectrum of **6** in  $\text{DMSO-}d_6$ .



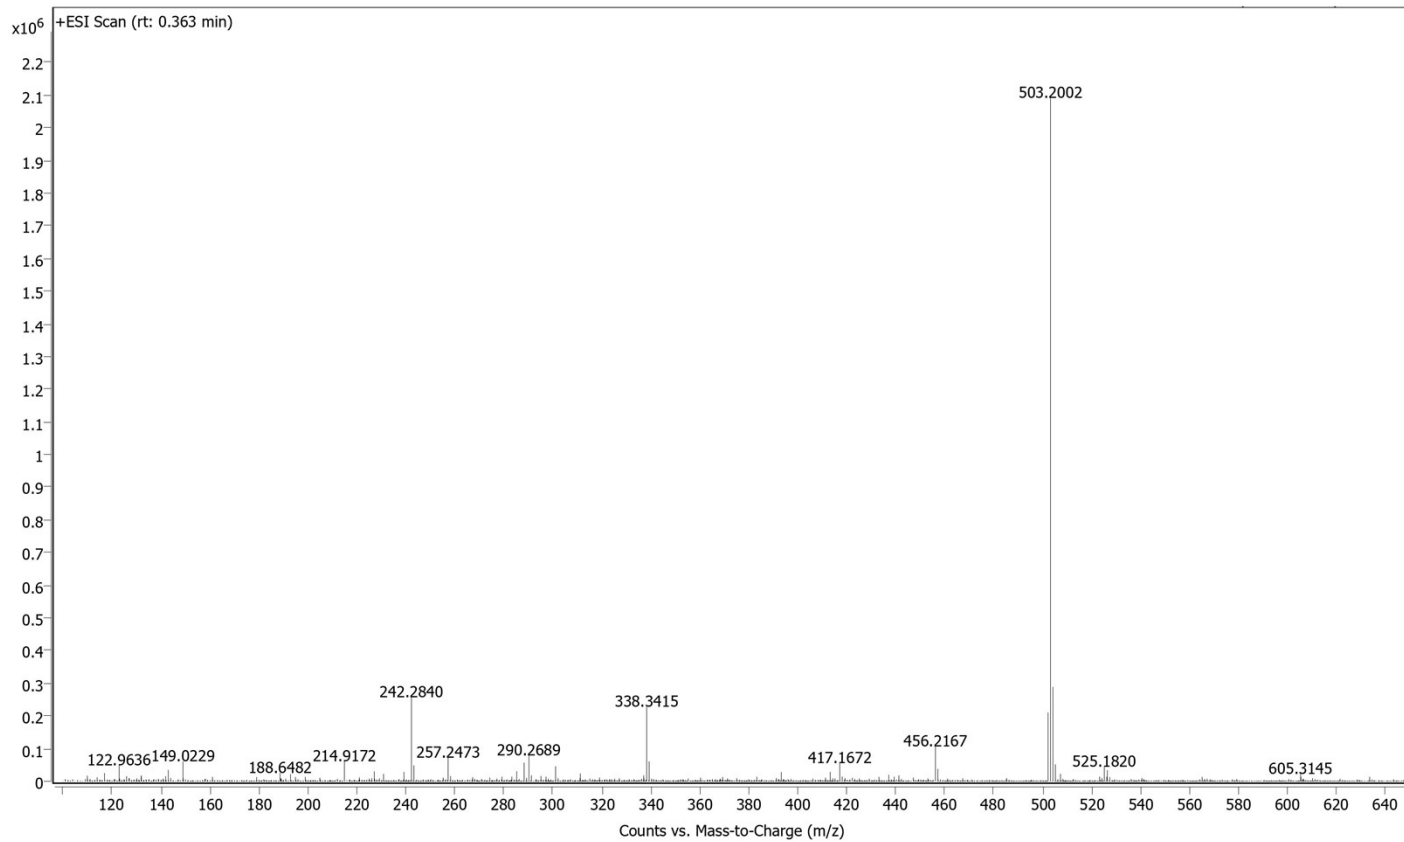

**Fig. S4.** The HRMS of compound 6.

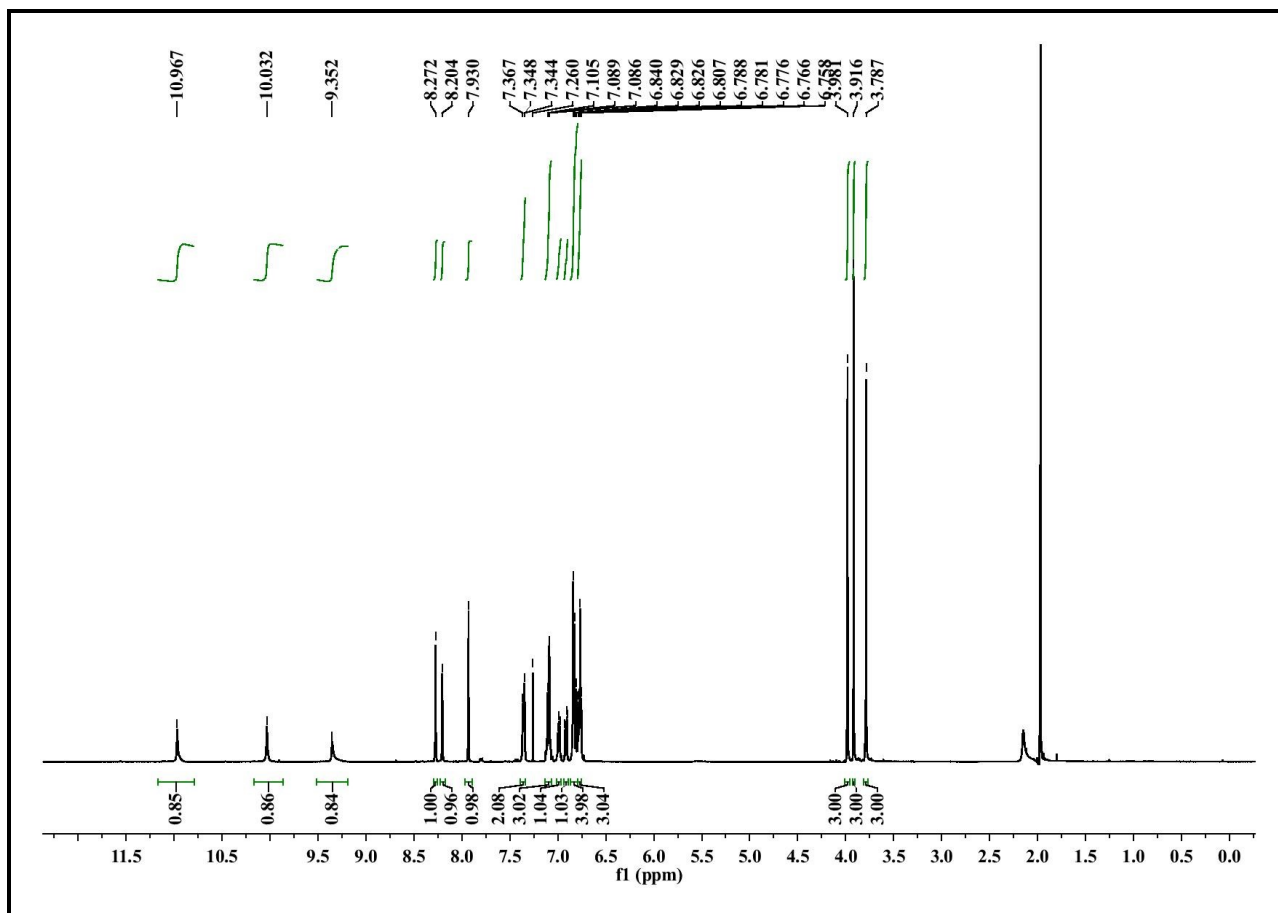

Fig. S5.  $^1\text{H}$  NMR Spectrum of 7 in  $\text{CDCl}_3$ .

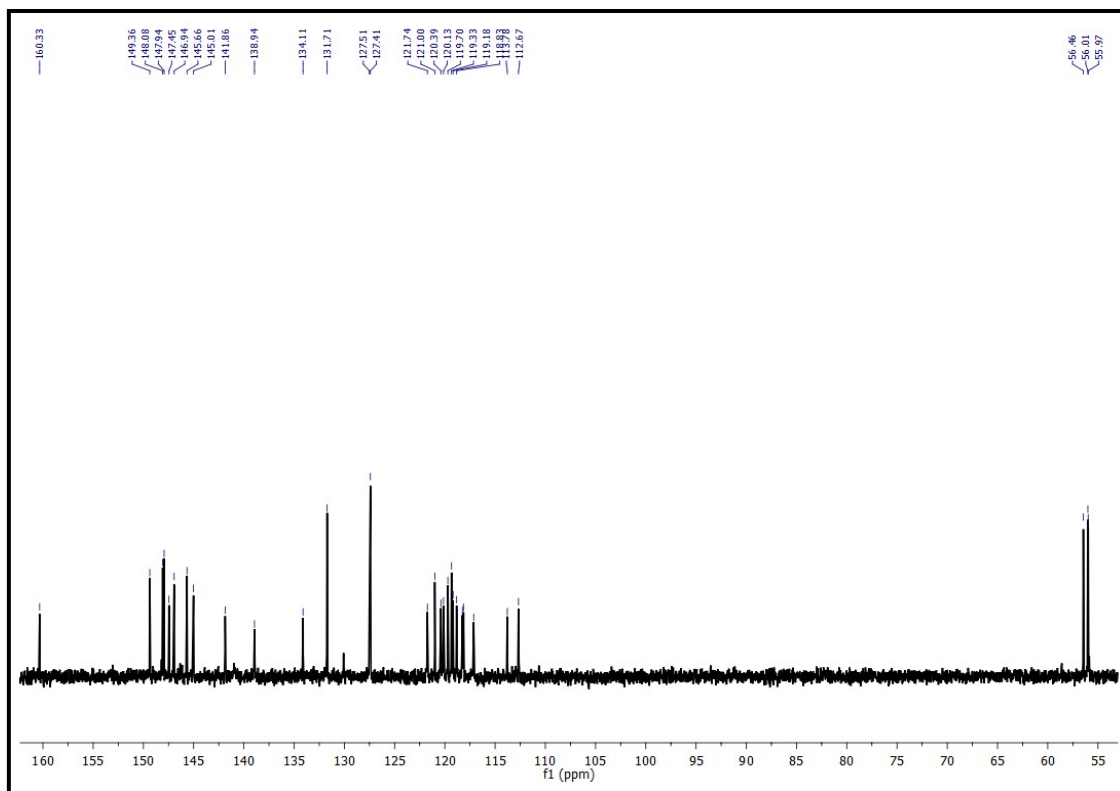

Fig. S6.  $^{13}\text{C}$  NMR Spectrum of 7 in  $\text{DMSO-d}_6$ .

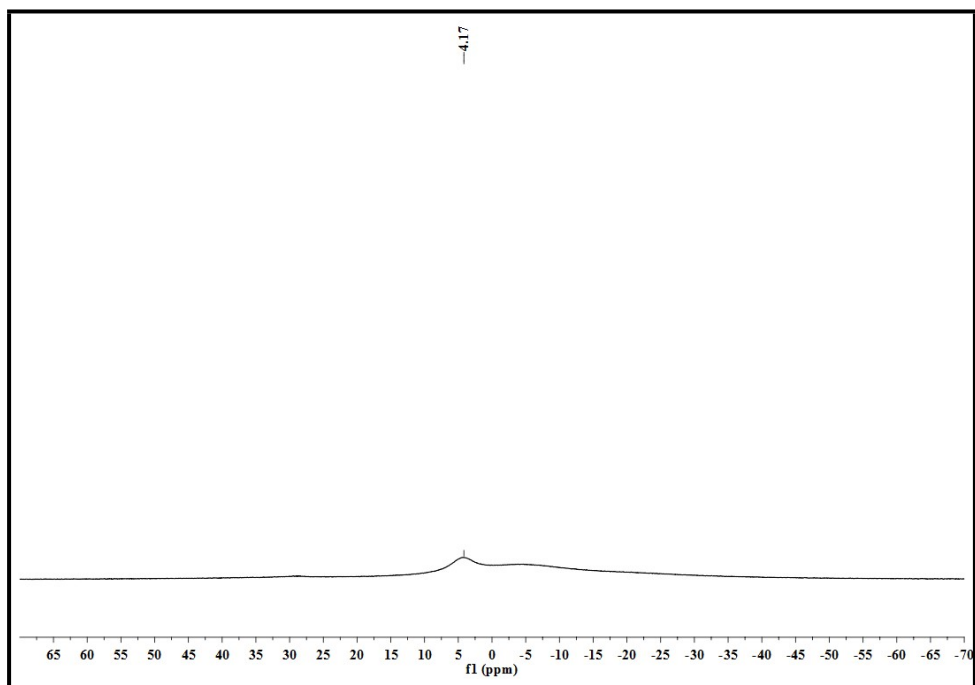

Fig. S7.  $^{11}\text{B}$  NMR Spectrum of 7 in  $\text{CDCl}_3$ .

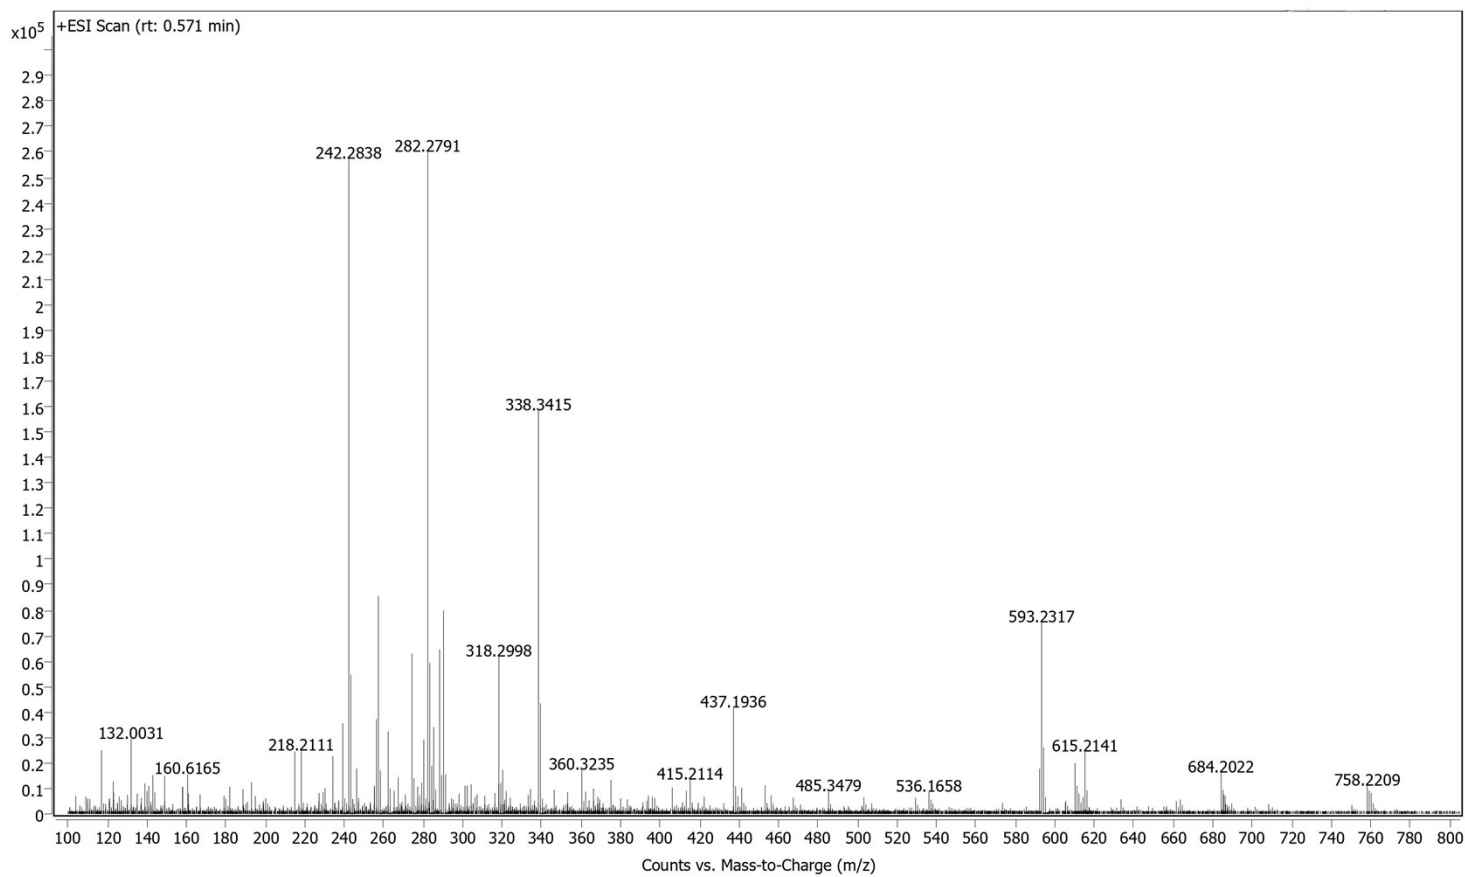

**Fig. S8.** The HRMS of compound 7.

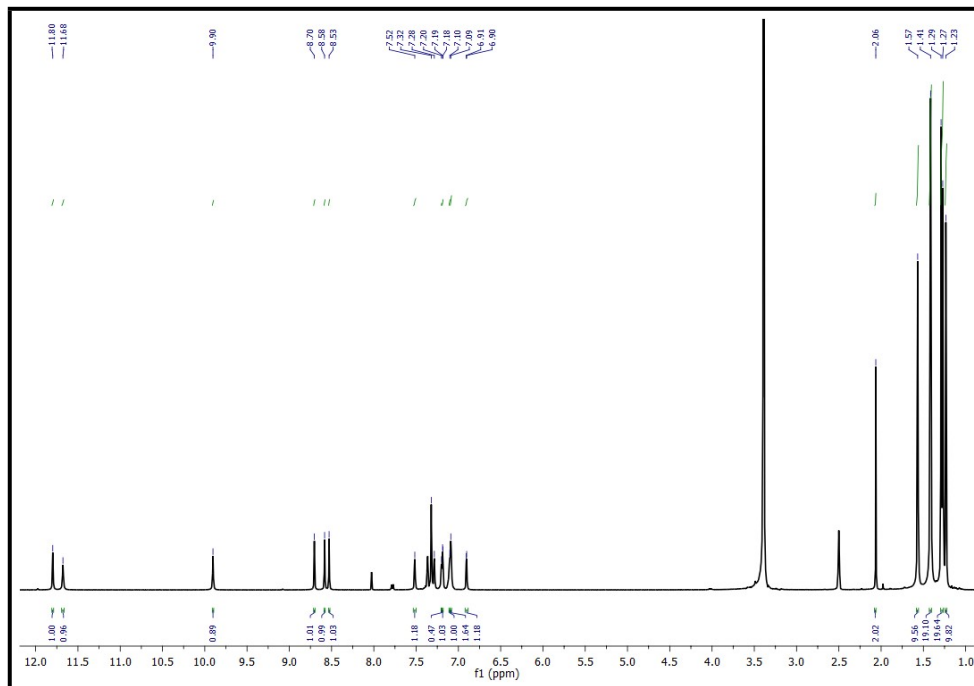

Fig. S9.  $^1\text{H}$  NMR Spectrum of **8** in  $\text{DMSO-d}_6$ .

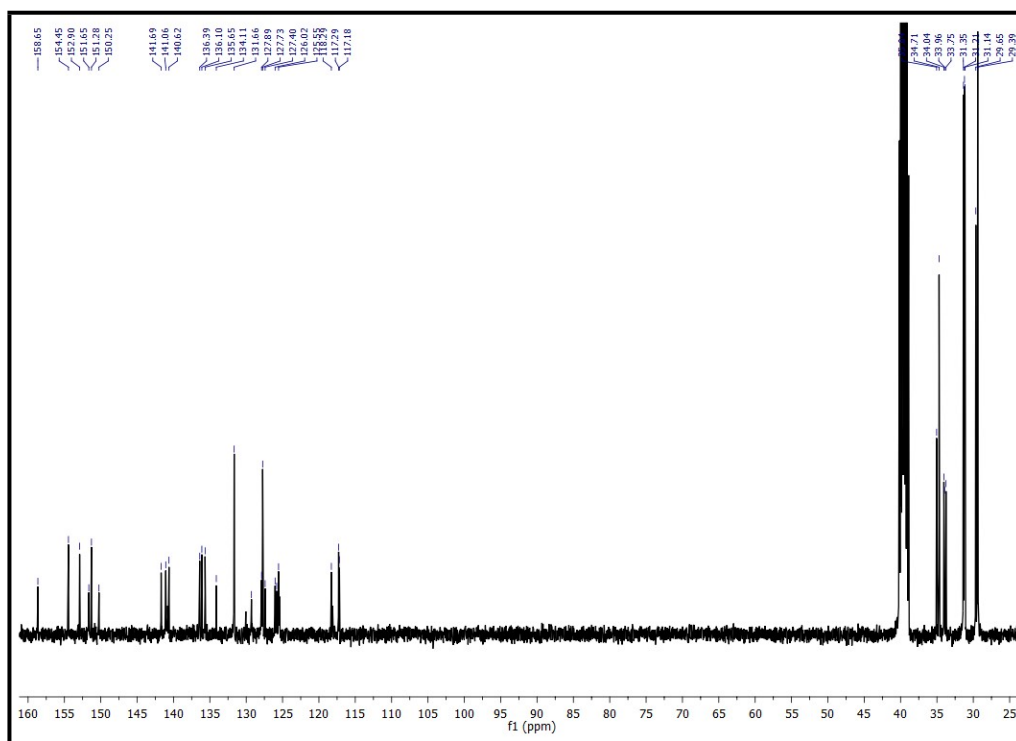

Fig. S10.  $^{13}\text{C}$  NMR Spectrum of **8** in  $\text{DMSO-d}_6$ .

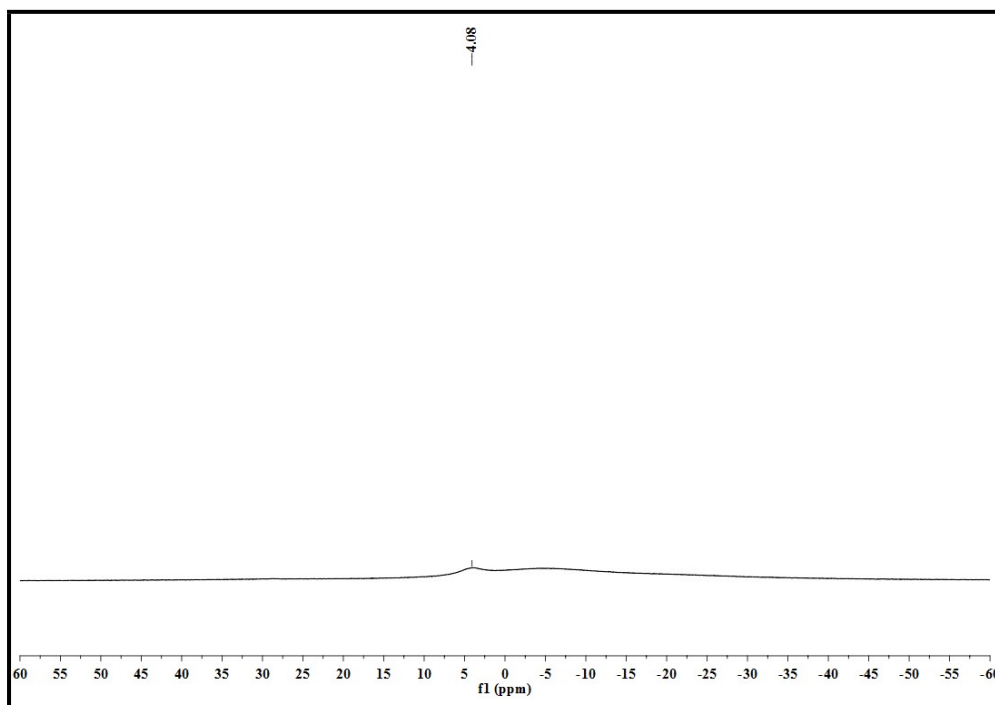

**Fig. S11.**  $^{11}\text{B}$  NMR Spectrum of **8** in  $\text{CDCl}_3$ .

LN-01 #83 RT: 0.84 AV: 1 NL: 1.39E7  
T: FTMS + p ESI Full ms [150.0000-1000.0000]

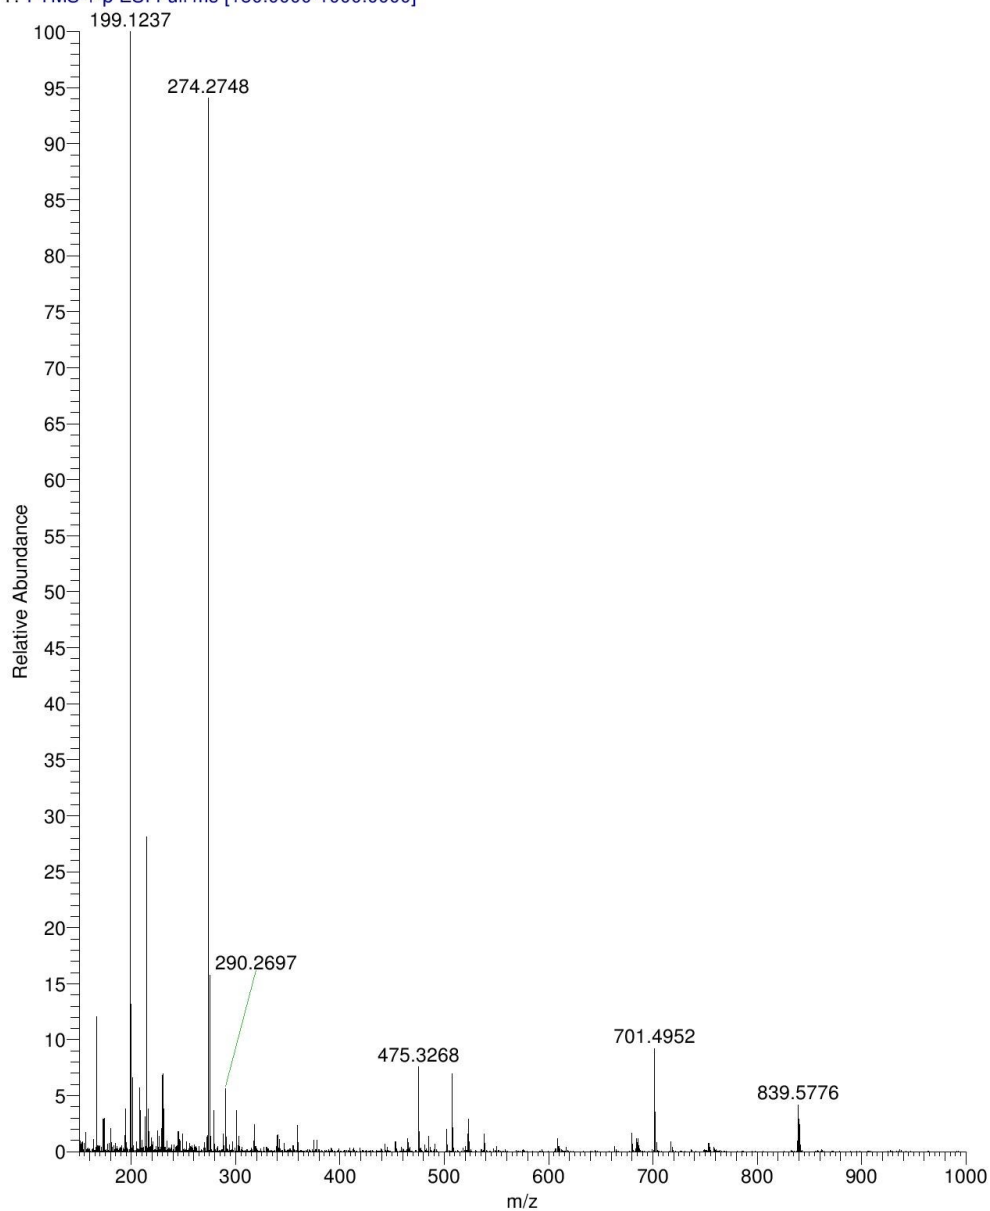

**Fig. S12.** The HRMS of compound 8.

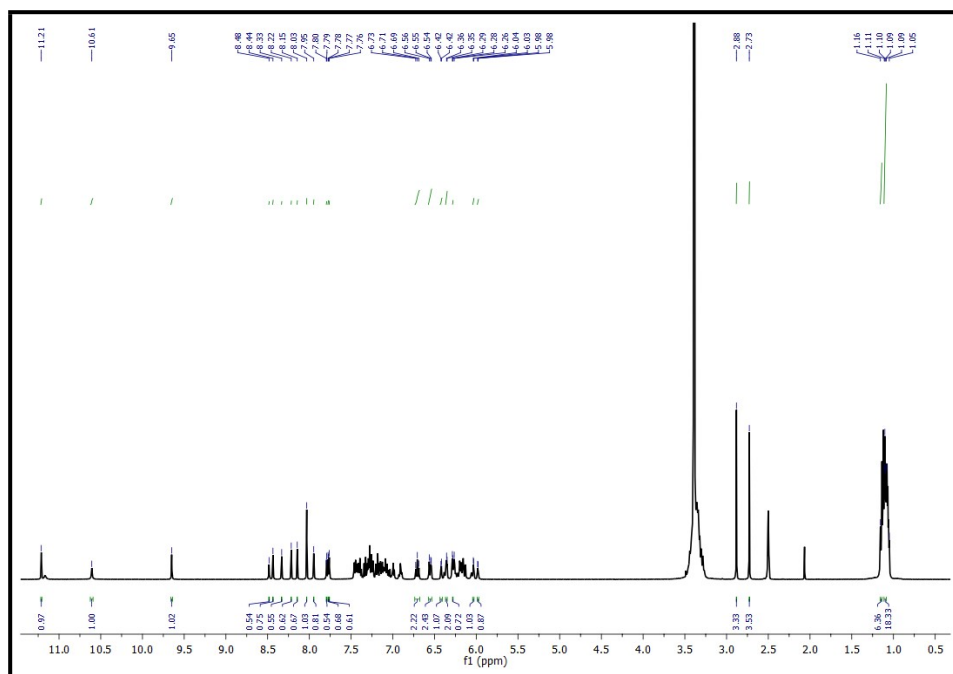

Fig. S13.  $^1\text{H}$  NMR Spectrum of **9** in  $\text{DMSO-d}_6$ .

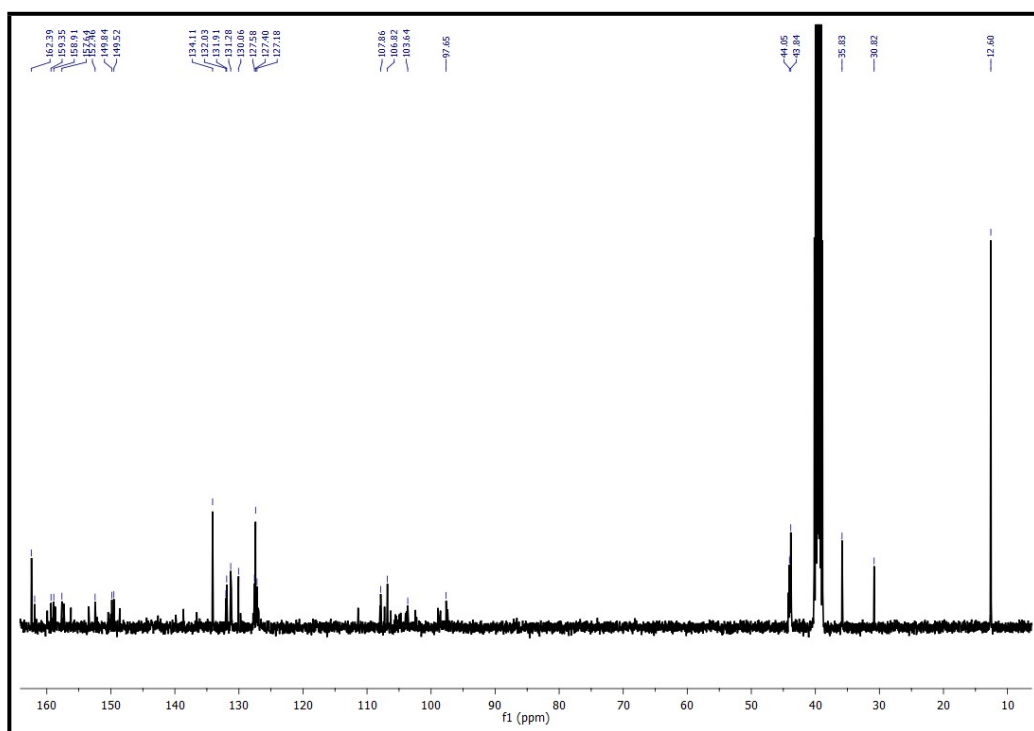

Fig. S14.  $^{13}\text{C}$  NMR Spectrum of **9** in  $\text{DMSO-d}_6$ .



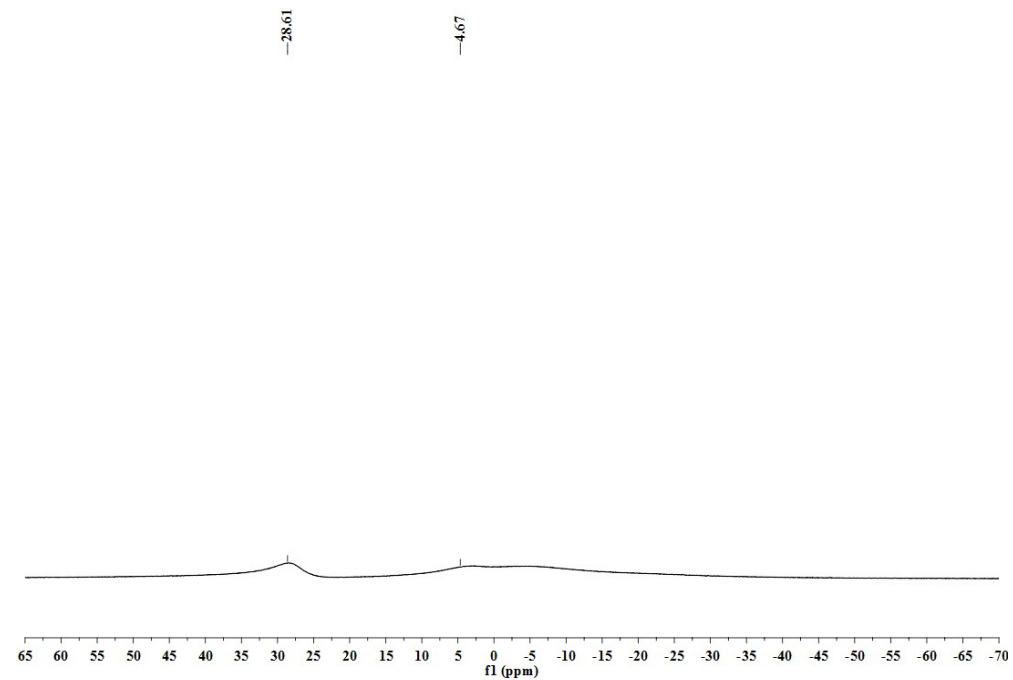

**Fig. S15**  $^{11}\text{B}$  NMR Spectrum of **9** in  $\text{CDCl}_3$ .

LN-04 #45 RT: 0.46 AV: 1 NL: 4.62E8  
T: FTMS + p ESI Full ms [150.0000-1000.0000]

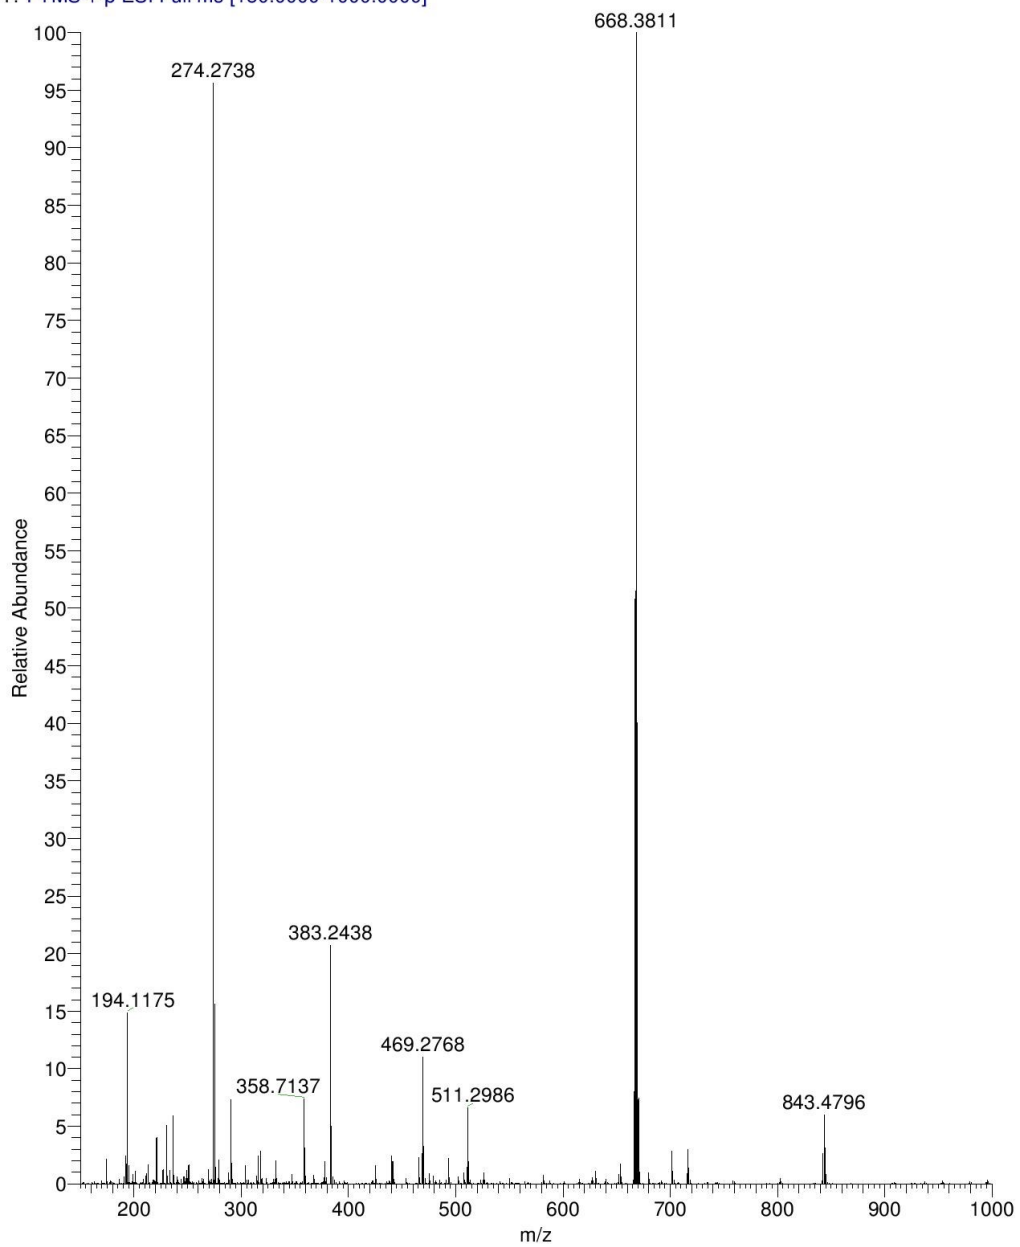

**Fig. S16.** The HRMS of compound **9**.

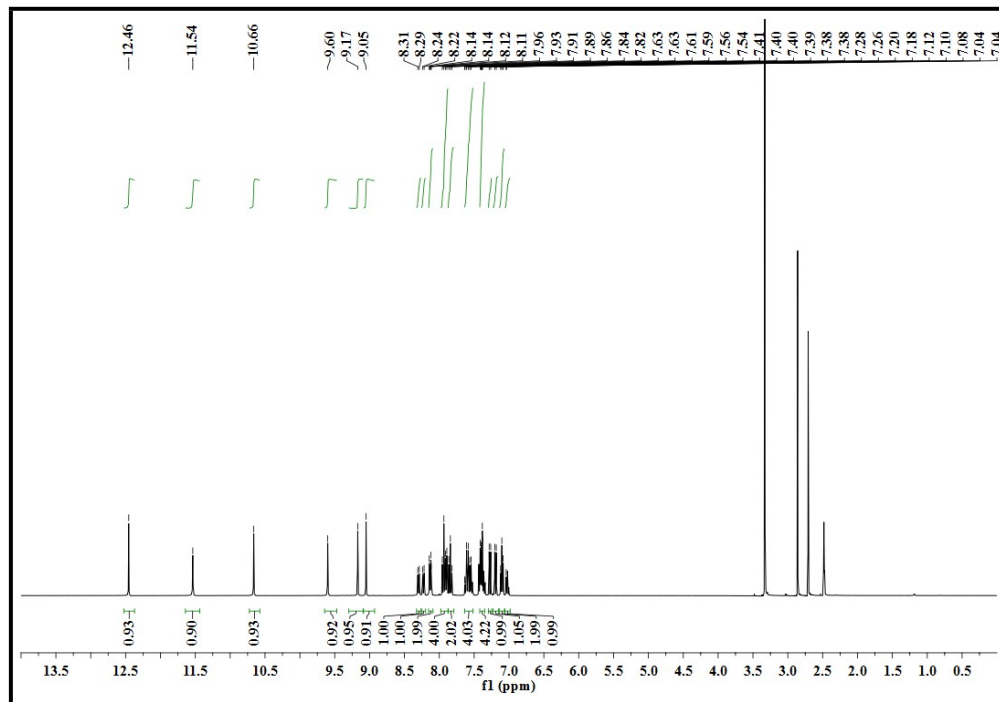

Fig. S17.  $^1\text{H}$  NMR Spectrum of **10** in  $\text{DMSO-}d_6$ .

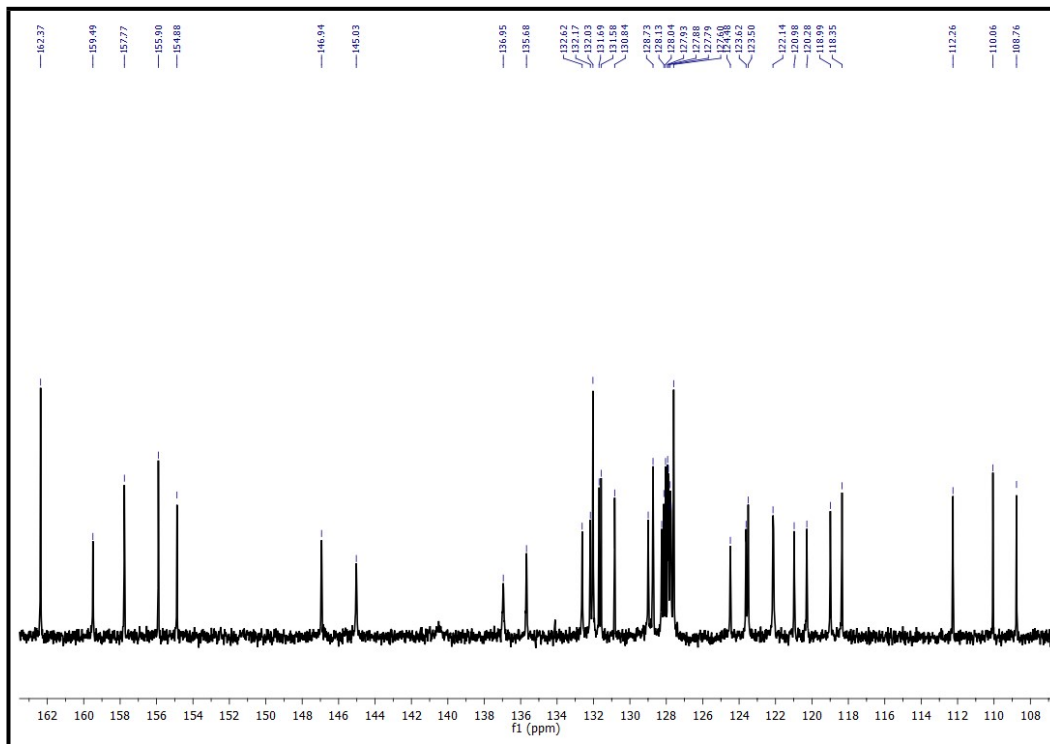

Fig. S18.  $^{13}\text{C}$  NMR Spectrum of **10** in  $\text{DMSO-}d_6$ .

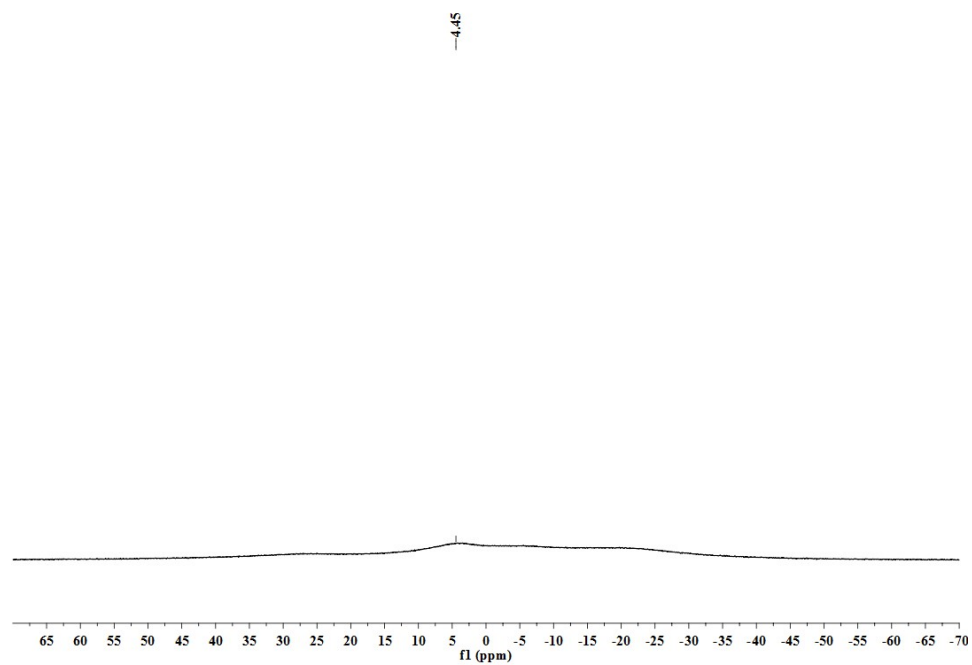

**Fig. S19.**  $^{11}\text{B}$  NMR Spectrum of **10** in  $\text{DMSO-}d_6$ .

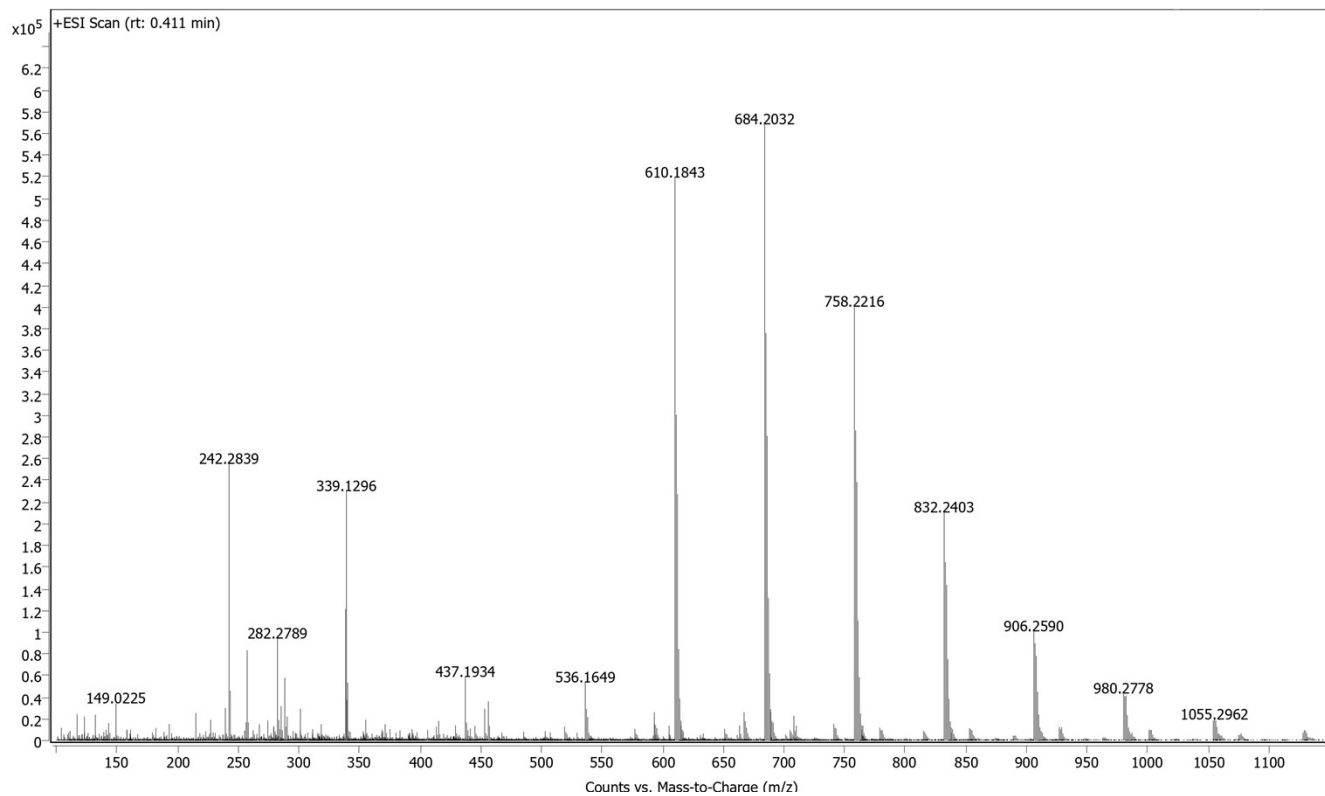

**Fig. S20.** The HRMS of compound 10.

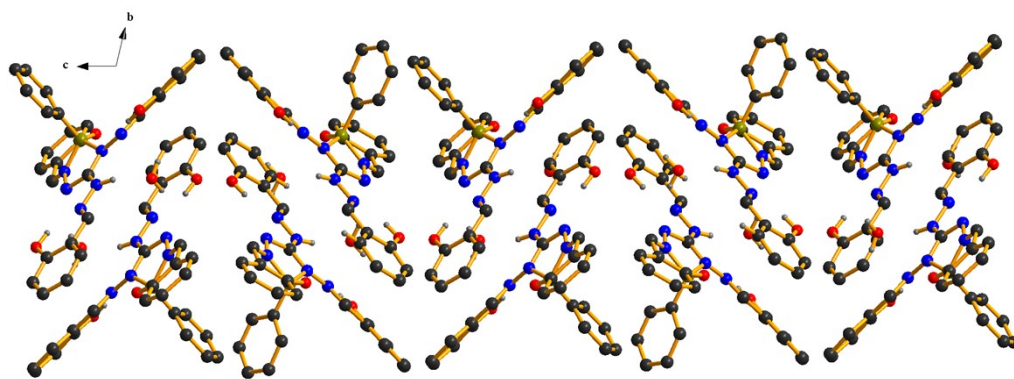

**Fig. S21** Two-dimensional chain like supramolecular network of **6**.

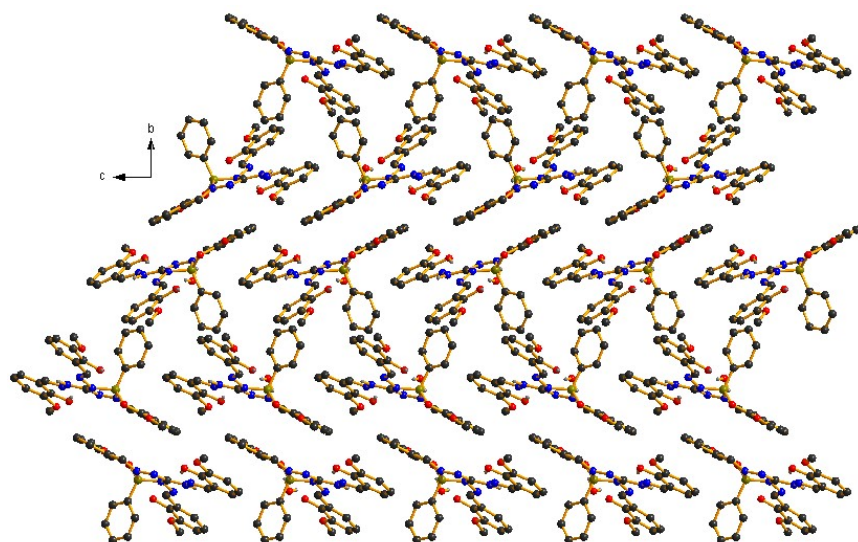

**Fig. S22** Two-dimensional polymeric supramolecular network of **7**.

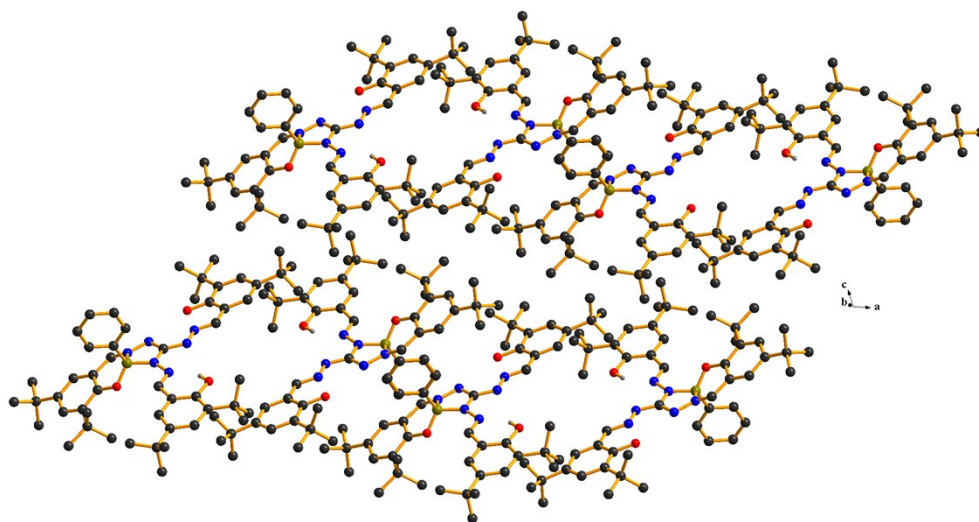

**Fig. S23** Two-dimensional polymeric supramolecular network of **8**.

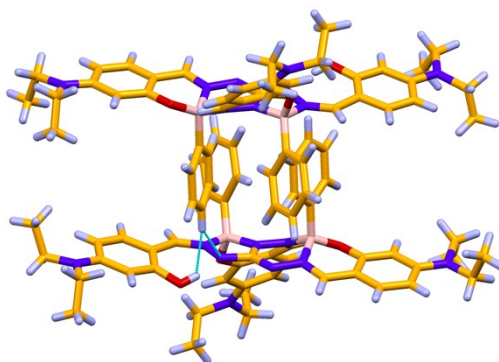

**Fig. S24** Dimeric structure of compound **9**.

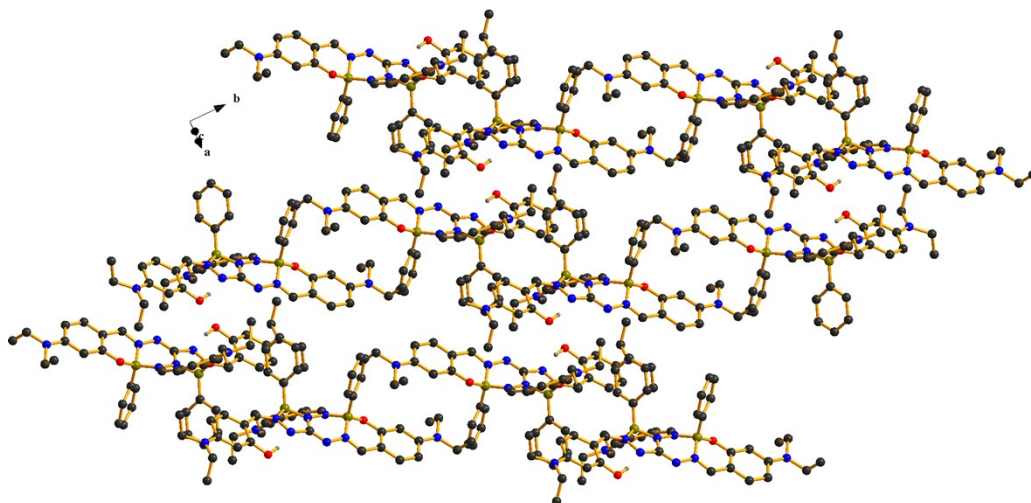

**Fig. S25** Two-dimensional supramolecular network of **9**.

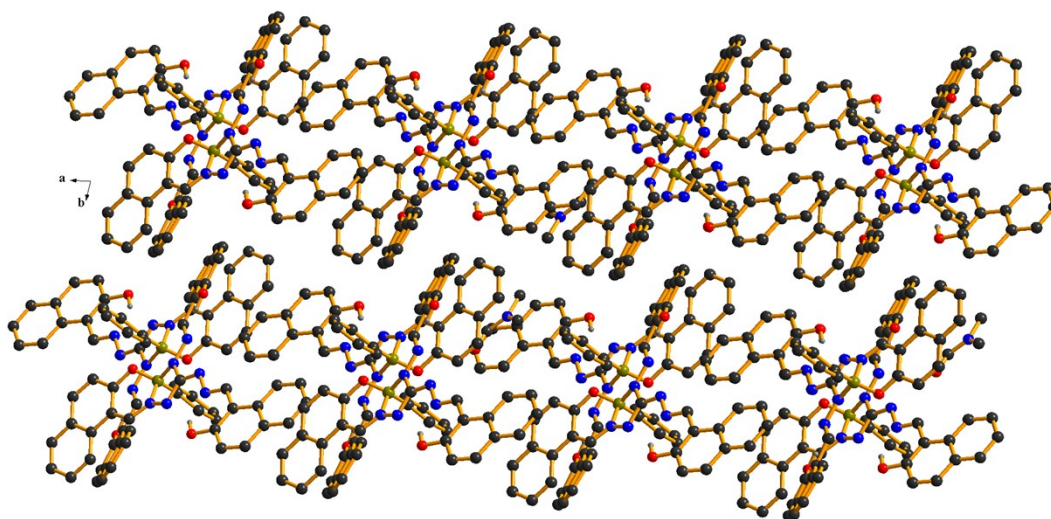

**Fig. S26** Two-dimensional chain like supramolecular network of **10**.



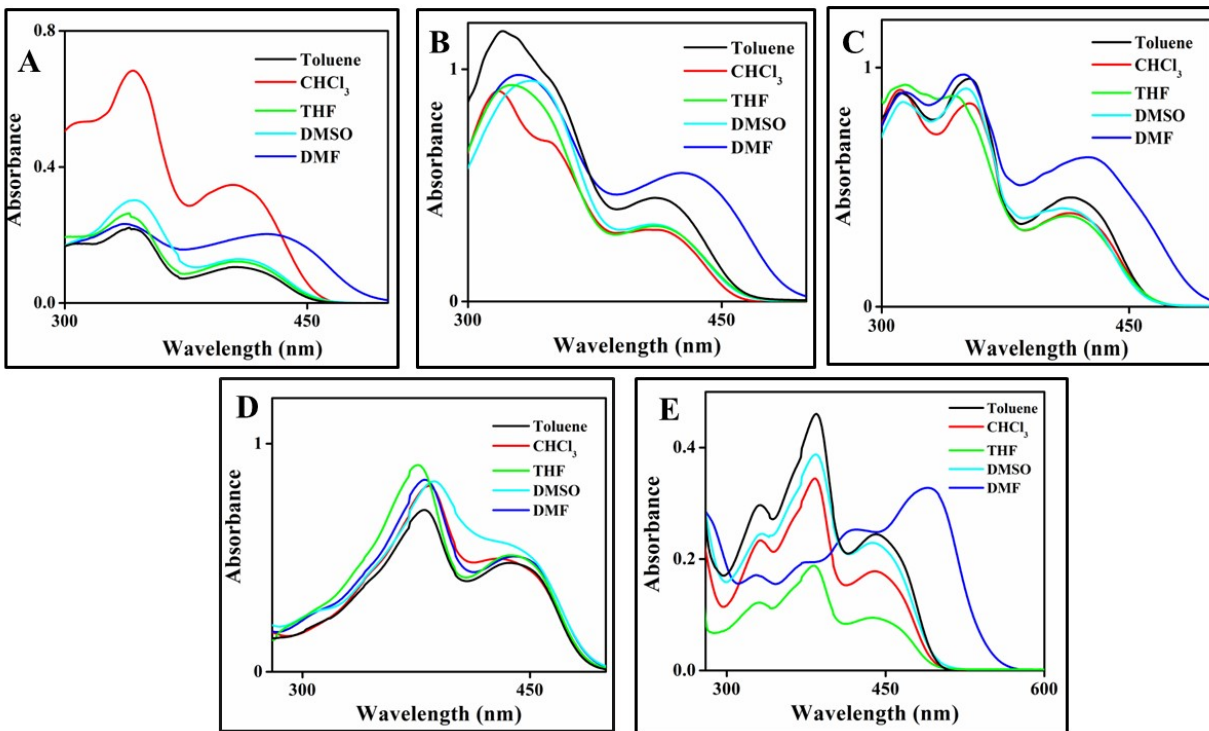

**Fig. S27.** Absorption spectra of boron compounds **6-10** (A - E) in various solvents with different polarities at room temperature.

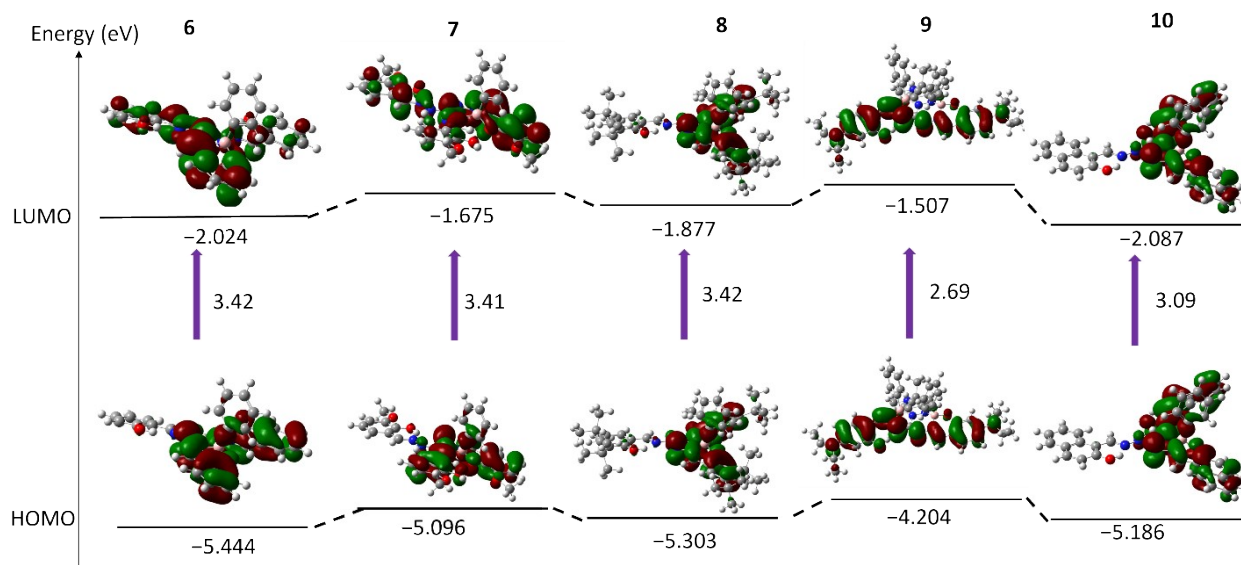

**Fig. S28.** Enol form of selected frontier molecular orbital of organoboron complexes **6-10** based on optimized ground state geometry. Calculation was performed at B3LYP/6-31G(d) level with Gaussian 16.

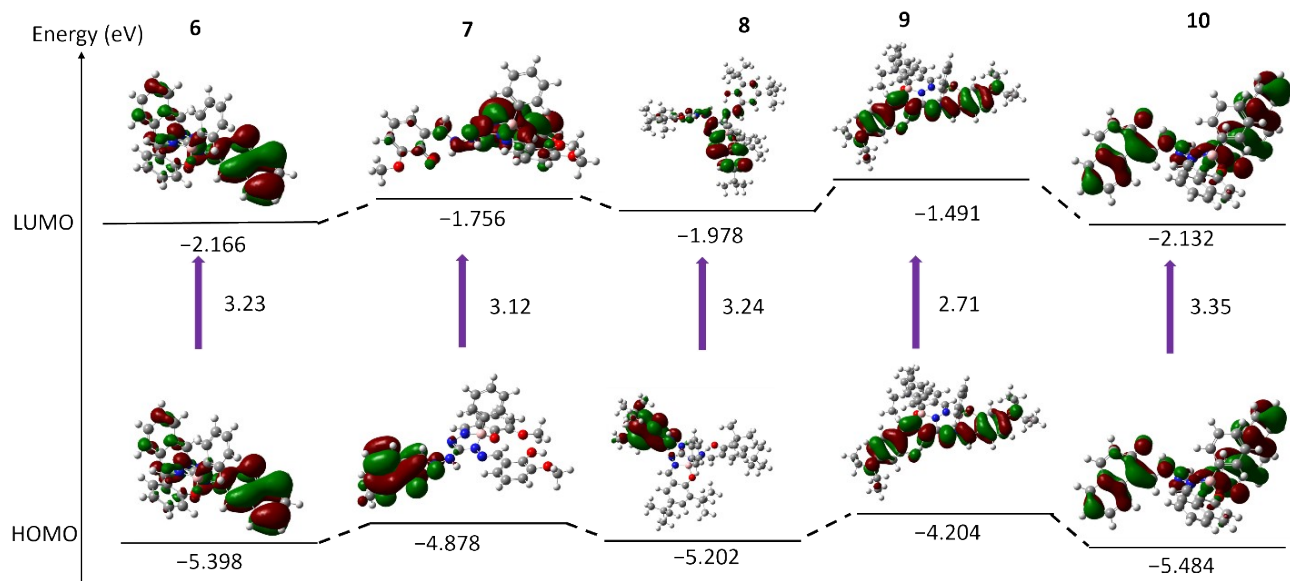

**Fig. S29.** Keto form of selected frontier molecular orbital of organoboron complexes **6-10** based on optimized ground state geometry. Calculation was performed at B3LYP/6-31G(d) level with Gaussian 16.

**Table S2.** Selected bond lengths (Å) for [6-10] from X-ray and calculated structures using the B3LYP 6-31G method.

|        | <b>6</b> | <b>6 cal.</b> | <b>7</b> | <b>7 cal</b> | <b>8</b> | <b>8cal</b> | <b>9</b> | <b>9 cal</b> | <b>10</b> | <b>10cal</b> |
|--------|----------|---------------|----------|--------------|----------|-------------|----------|--------------|-----------|--------------|
| B1-N2  | 1.583(4) | 1.582         | 1.574(2) | 1.586        | 1.567(5) | 1.578       | 1.520(3) | 1.534        | 1.564(3)  | 1.574        |
| B1-N3  | 1.566(4) | 1.568         | 1.561(3) | 1.566        | 1.542(3) | 1.567       | 1.571(5) | 1.593        | 1.561(1)  | 1.565        |
| B1-O1  | 1.450(4) | 1.468         | 1.459(3) | 1.465        | 1.454(3) | 1.469       | 1.462(4) | 1.478        | 1.463(1)  | 1.472        |
| B1-C23 | 1.597(3) | 1.612         | 1.611(3) | 1.566        | 1.605(5) | 1.616       | 1.592(1) | 1.593        | 1.607(2)  | 1.614        |
| B1-N2  |          |               |          |              |          |             | 1.573(3) | 1.587        |           |              |
| B1-N3  |          |               |          |              |          |             | 1.566(2) | 1.579        |           |              |
| B1-O1  |          |               |          |              |          |             | 1.444(3) | 1.462        |           |              |
| B1-C23 |          |               |          |              |          |             | 1.599(2) | 1.612        |           |              |

**Table S3.** Electronic transition for organoboron complexes 6-10 calculated using the B3LYP 6-31G method.

| <b>Complexes</b> | <b>Transition</b>              | <b>MO Contribution</b> | <b>Energy gap</b> |           | <b>Oscillator Strength (f)</b> |
|------------------|--------------------------------|------------------------|-------------------|-----------|--------------------------------|
|                  |                                |                        | <b>ev</b>         | <b>nm</b> |                                |
| <b>6</b>         | S <sub>0</sub> -S <sub>1</sub> | HOMO → LUMO            | 3.42              | 371       | 0.4242                         |
| <b>7</b>         | S <sub>0</sub> -S <sub>1</sub> | HOMO → LUMO            | 3.41              | 377       | 0.3129                         |
| <b>8</b>         | S <sub>0</sub> -S <sub>1</sub> | HOMO → LUMO            | 3.42              | 374       | 0.3617                         |
| <b>9</b>         | S <sub>0</sub> -S <sub>1</sub> | HOMO → LUMO            | 2.69              | 416       | 0.4507                         |
| <b>10</b>        | S <sub>0</sub> -S <sub>1</sub> | HOMO → LUMO            | 3.09              | 400       | 0.5116                         |

**Table S4.** UV-visible absorption and emission spectra of **6-10** in different solvents at room temperature.

| <b>Solvents</b> |                             | <b>Toluene</b> | <b>CHCl<sub>3</sub></b> | <b>THF</b>    | <b>DMSO</b>   | <b>DMF</b>    |
|-----------------|-----------------------------|----------------|-------------------------|---------------|---------------|---------------|
| 6               | $\lambda_{\text{abs}}$ (nm) | 342, 409       | 343, 405                | 341, 409      | 342, 409      | 338, 432      |
|                 | $\lambda_{\text{em}}$ (nm)  | 485, 507       | 487, 505                | 485, 502      | 479, 518      | 481, 515      |
|                 | $\Phi_{\text{F}}$           | 0.006          | 0.010                   | 0.001         | 0.016         | 0.020         |
| 7               | $\lambda_{\text{abs}}$ (nm) | 320,414        | 317,415                 | 327,415       | 338,415       | 330,428       |
|                 | $\lambda_{\text{em}}$ (nm)  | 500,535        | 499                     | 510           | 496,544       | 498,463       |
|                 | $\Phi_{\text{F}}$           | 0.008          | 0.007                   | 0.004         | 0.009         | 0.014         |
| 8               | $\lambda_{\text{abs}}$ (nm) | 353, 416       | 354, 416                | 344, 415      | 352, 413      | 350, 428      |
|                 | $\lambda_{\text{em}}$ (nm)  | 482, 522       | 481, 499                | 480, 501      | 482, 518      | 478, 533      |
|                 | $\Phi_{\text{F}}$           | 0.016          | 0.017                   | 0.006         | 0.004         | 0.040         |
| 9               | $\lambda_{\text{abs}}$ (nm) | 379, 439       | 380, 436                | 376, 441      | 386, 443      | 382, 440      |
|                 | $\lambda_{\text{em}}$ (nm)  | 541            | 509, 560                | 503, 556      | 478,573       | 574           |
|                 | $\Phi_{\text{F}}$           | 0.012          | 0.046                   | 0.005         | 0.012         | 0.088         |
| 10              | $\lambda_{\text{abs}}$ (nm) | 330, 383, 441  | 331, 383, 441           | 329, 382, 441 | 332, 384, 437 | 329, 371, 492 |
|                 | $\lambda_{\text{em}}$ (nm)  | 507, 533       | 501, 529                | 503,530       | 507,539       | 550           |
|                 | $\Phi_{\text{F}}$           | 0.052          | 0.026                   | 0.004         | 0.006         | 0.031         |

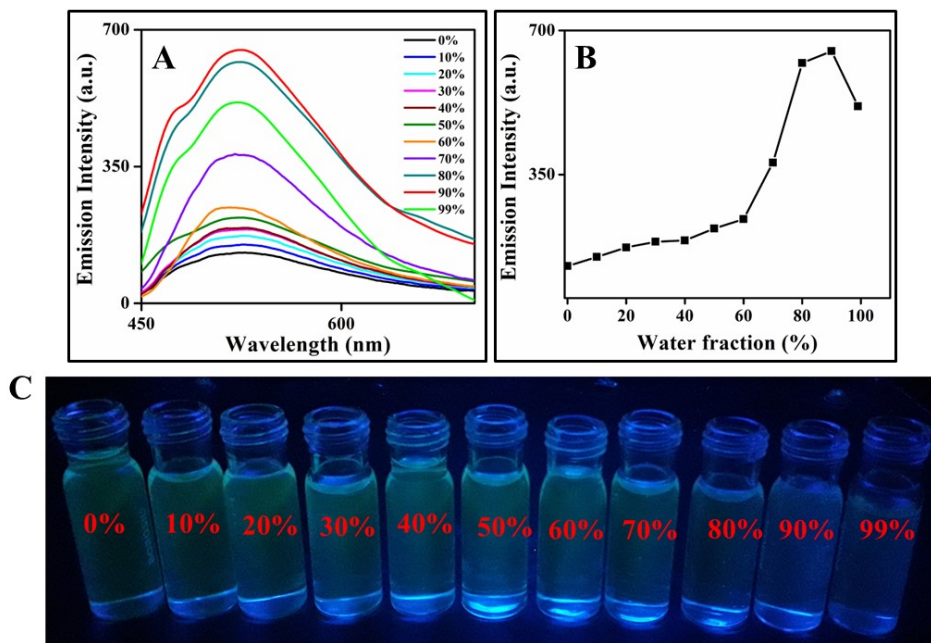

**Fig. S30.** (A) Emission spectra of **6** in different water fractions in THF and water mixture binary solvent;  $\lambda_{\text{ex}} = 420$  nm. (B) Plots of emission intensity vs water fraction. (C) Fluorescent images in different water fractions (under UV light).

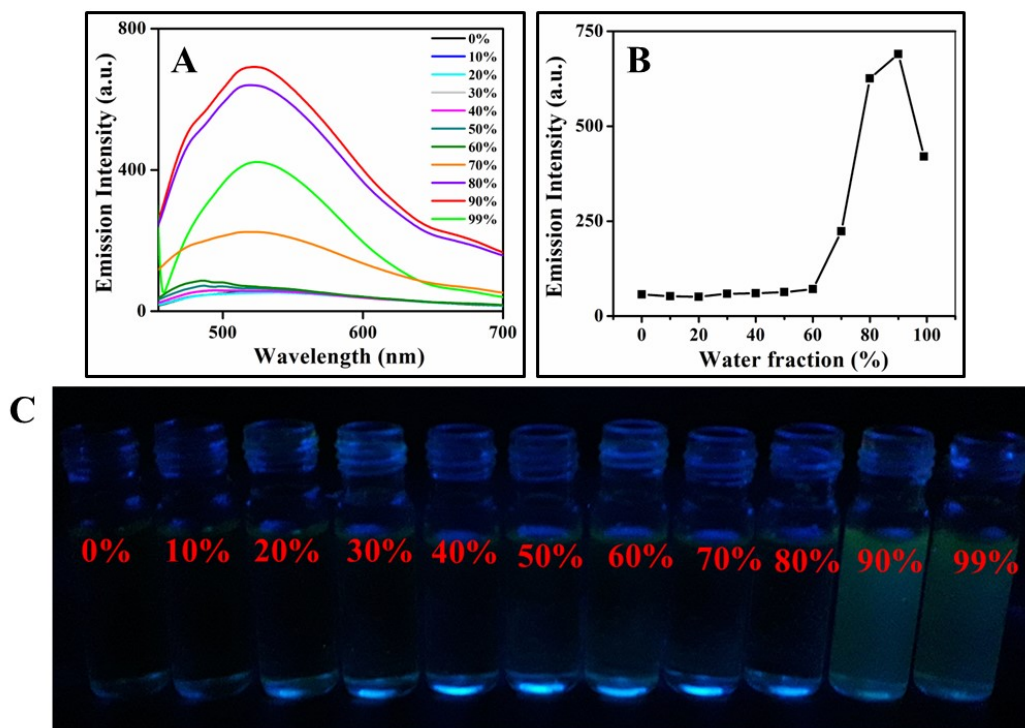

**Fig. S31.** (A) Emission spectra of **7** in different water fractions in THF and water mixture binary solvent;  $\lambda_{\text{ex}} = 420$  nm. (B) Plots of emission intensity vs water fraction. (C) Fluorescent images of **7** in different water fractions (under UV light).

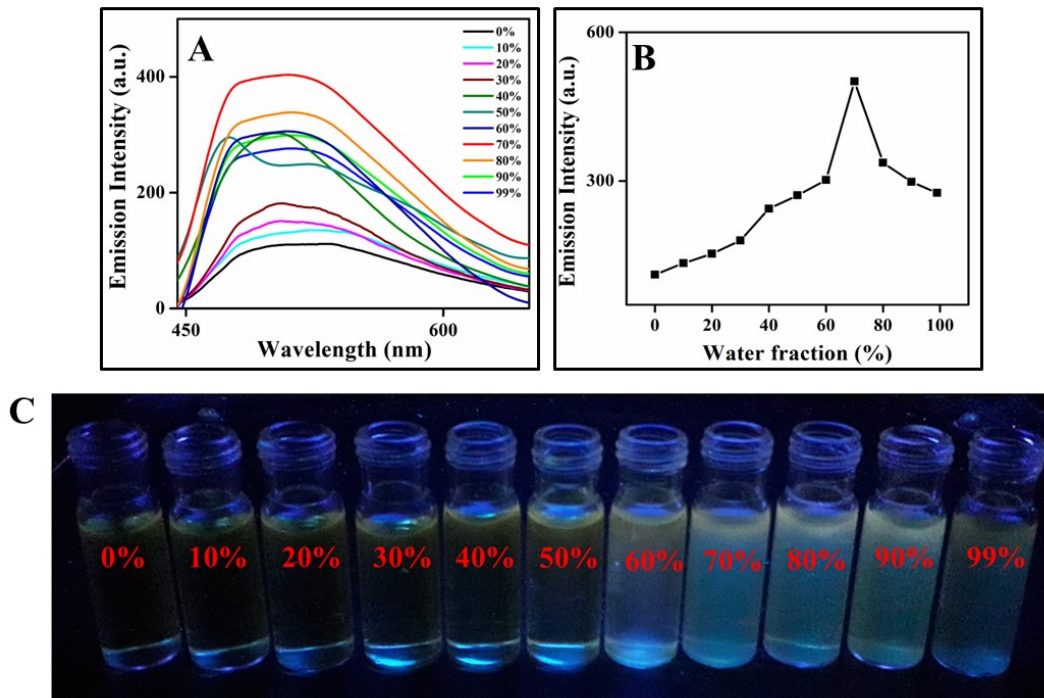

**Fig. S32.** (A) Emission spectra of **8** in different water fractions in THF and water mixture binary solvent;  $\lambda_{\text{ex}} = 420$  nm. (B) Plots of emission intensity vs water fraction. (C) Fluorescent images of **8** in different water fractions (under UV light).

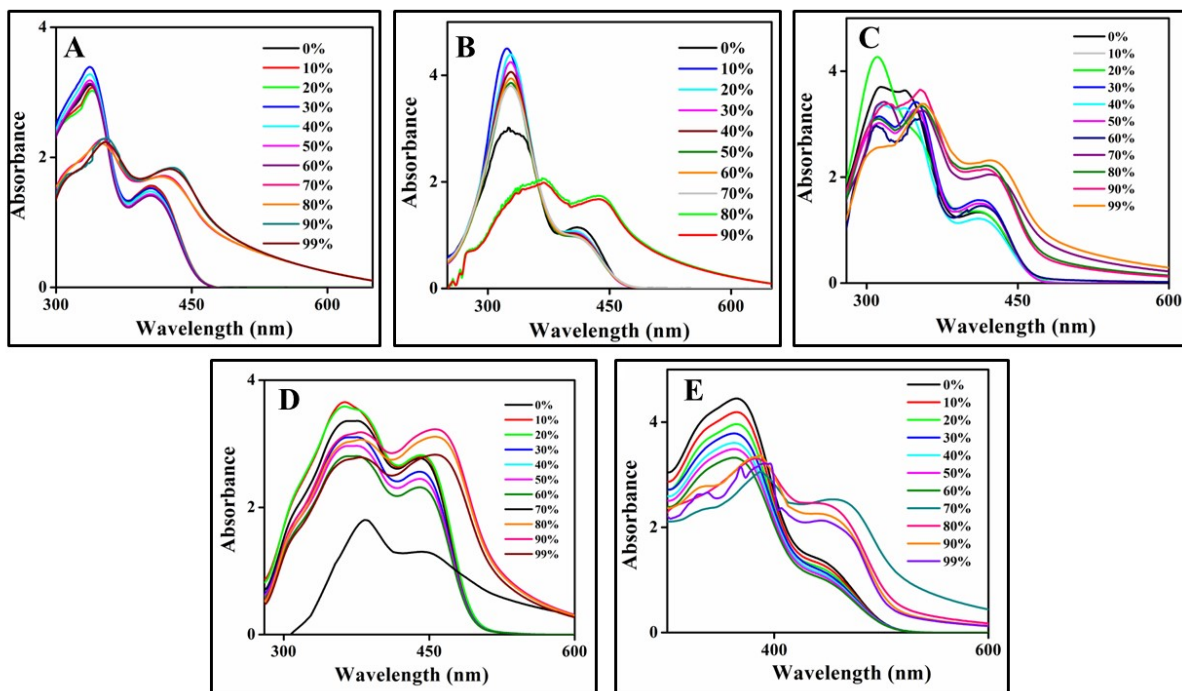

**Fig. S33.** UV-visible absorption spectra of compounds **6-10** (A-E) in THF-H<sub>2</sub>O (0-90 %) mixture with different water fractions.



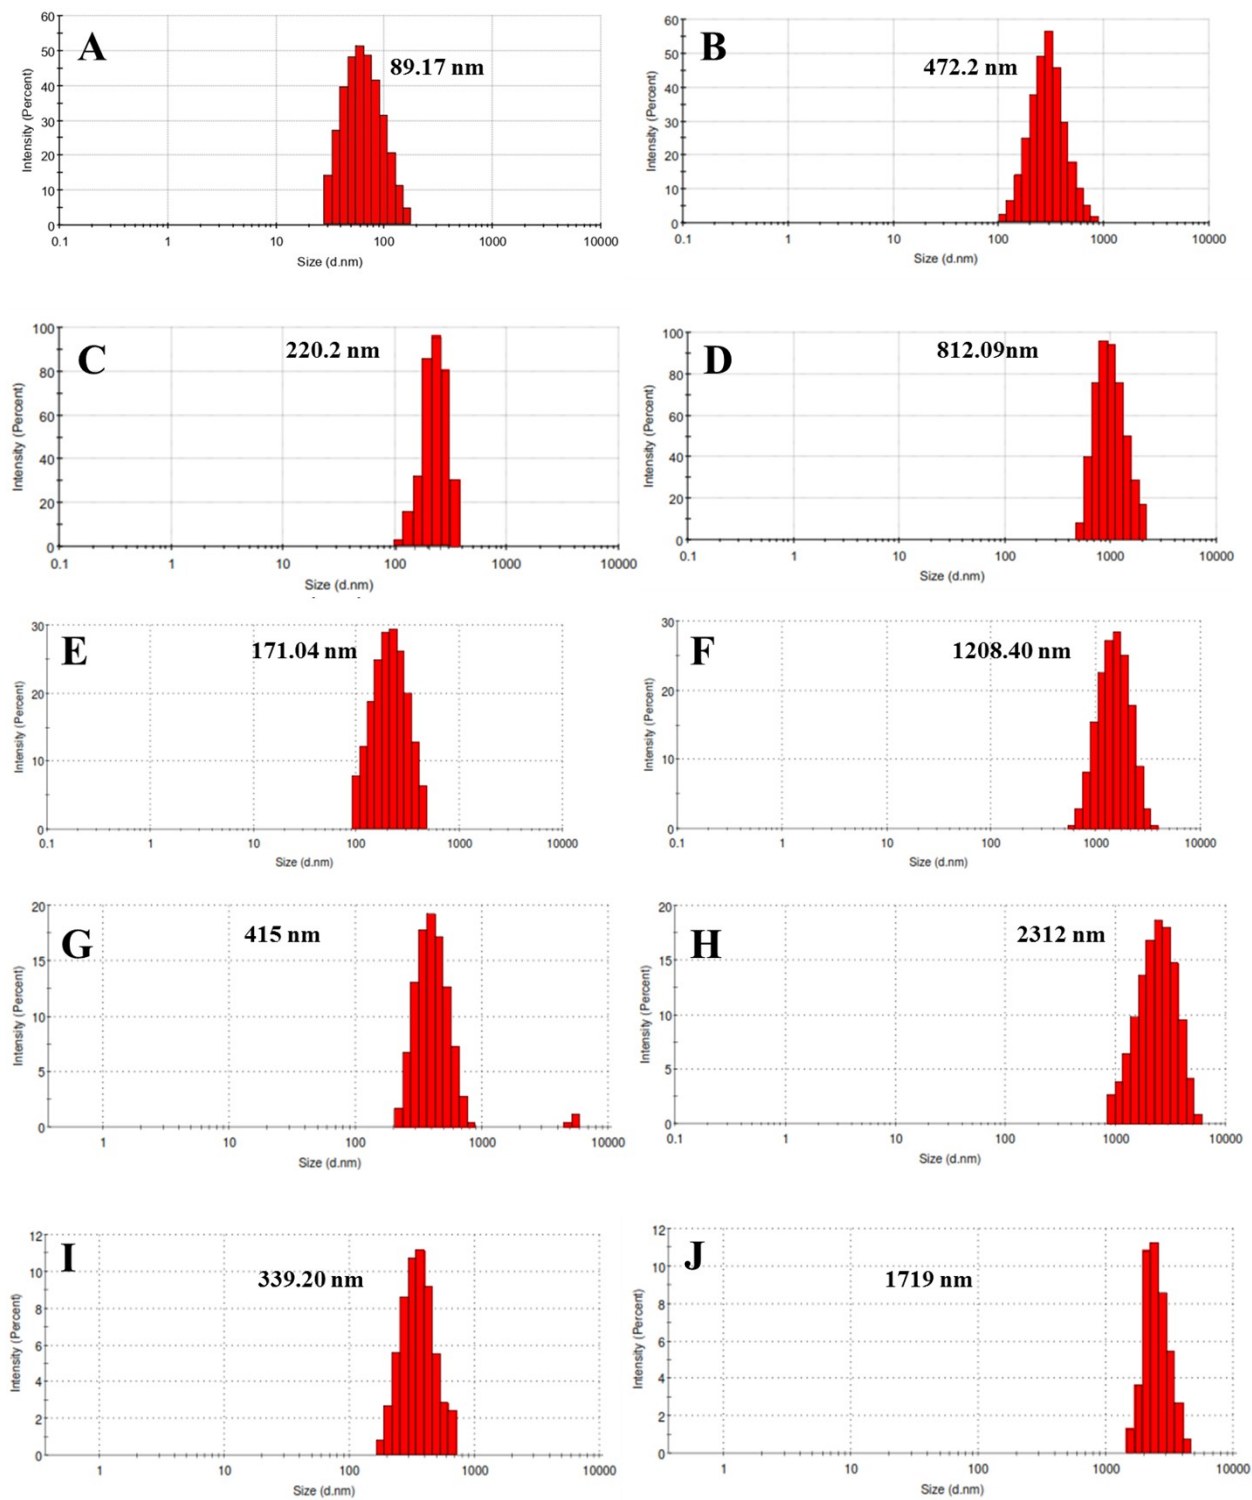

**Fig. S34.** DLS images of compounds (6-10) with particle size distribution in THF-H<sub>2</sub>O mixture (A, B) **6** (60 & 90%), (C, D) **7** (70 & 90%), (E, F) **8** (50 & 70%), (G, H) **9** (70 & 90%) and (I, J) **10** (70 & 90%)

**Table S5.** Results from DLS for the complex **6-10**.

| Complex   | Percentage of water (%) | Particle size (nm) |
|-----------|-------------------------|--------------------|
| <b>6</b>  | 60 & 90                 | 89.17 & 472.2      |
| <b>7</b>  | 70 & 90                 | 220.2 & 812.09     |
| <b>8</b>  | 50 & 70                 | 171.04 & 1208.04   |
| <b>9</b>  | 70 & 90                 | 415 & 2312         |
| <b>10</b> | 70 & 90                 | 339.20 & 1719      |

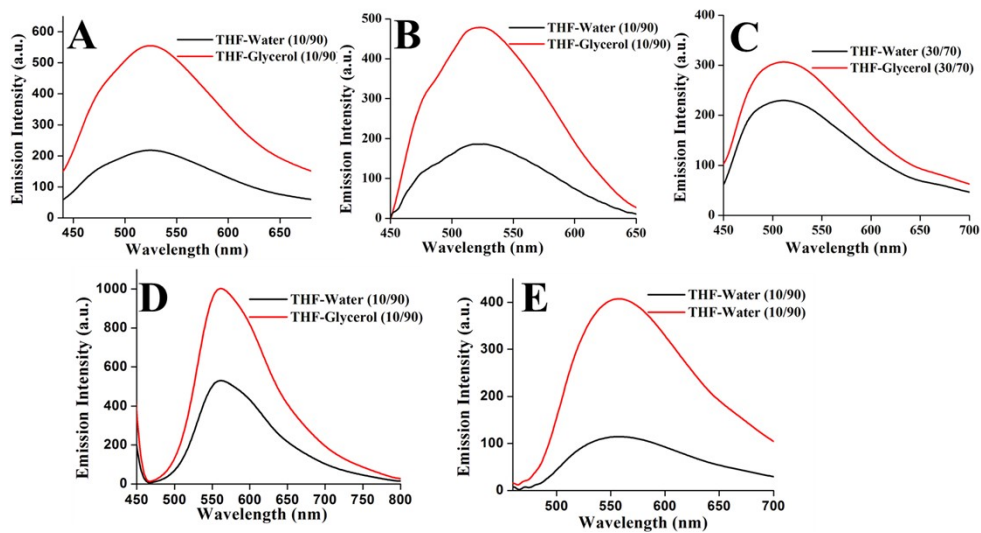

**Fig. S35.** Emission spectra of **6-10** in THF-H<sub>2</sub>O and THF-glycerol.

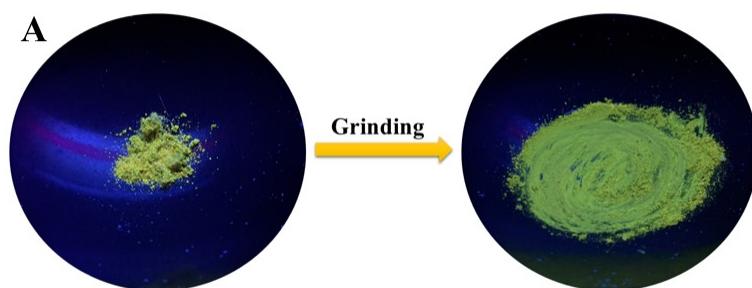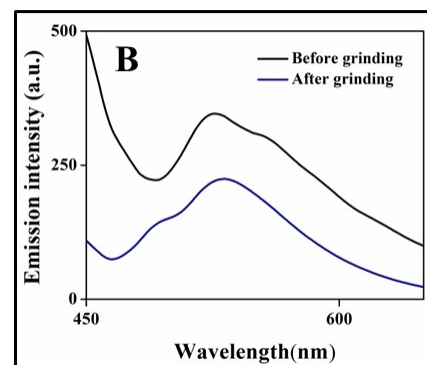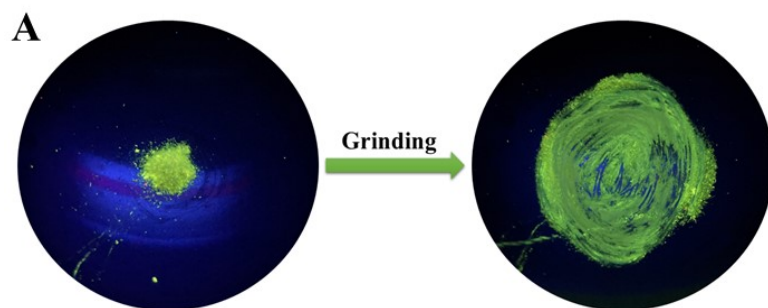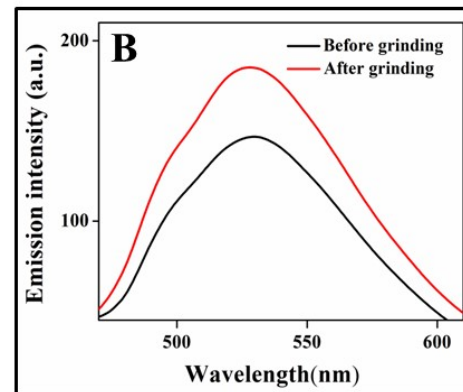

**Fig. S36.** (A). Images of the boron compounds (**7 & 8**) under UV-lamp. (B) Solid state emission spectra of compounds (**7 & 8**) crystals and ground samples.

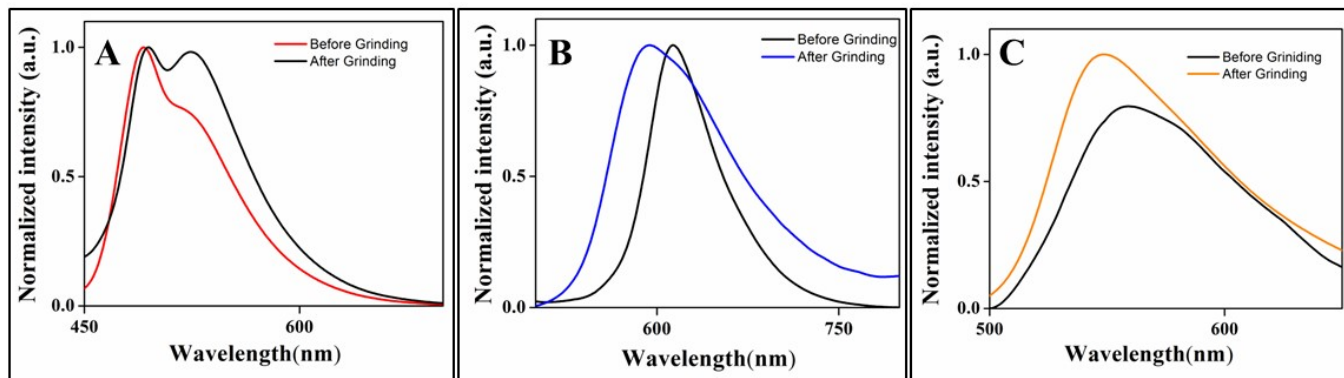

**Fig. S37.** (A) Normalized spectrum of the compound **6** before and after grinding. (B) Normalized spectrum of the compound **9** before and after grinding. (C) Normalized spectrum of the compound **10** before and after grinding.

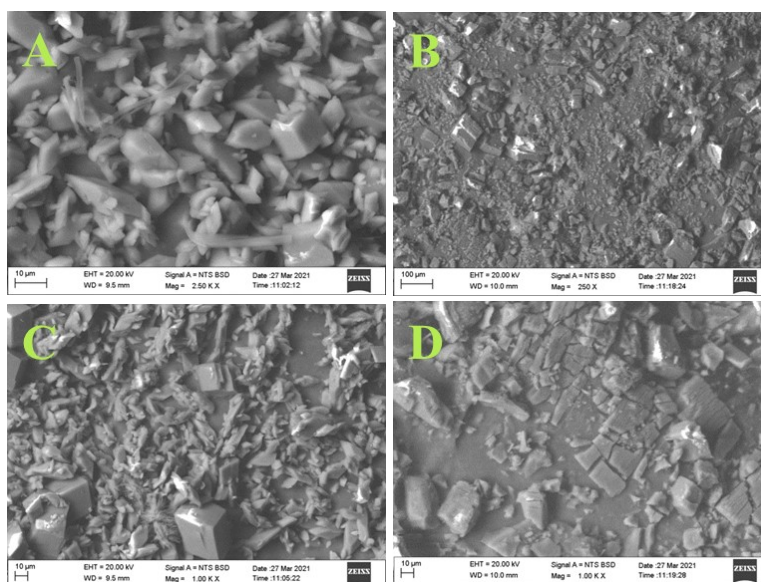

**Fig. S38.** SEM images of compounds **9** & **10** (A&B) before and (C&D) after grinding respectively.

**Table S6.** Crystal parameters and structure refinement data for compound **6-10**.

| Parameters                                       | <b>6</b>                                                                                                        | <b>7</b>                                                                                                            | <b>8</b>                                                                                                        |
|--------------------------------------------------|-----------------------------------------------------------------------------------------------------------------|---------------------------------------------------------------------------------------------------------------------|-----------------------------------------------------------------------------------------------------------------|
| Empirical formula                                | C <sub>28</sub> H <sub>25</sub> BN <sub>6</sub> O <sub>4</sub>                                                  | C <sub>31</sub> H <sub>29</sub> BN <sub>6</sub> O <sub>6</sub> ·2(C <sub>2</sub> H <sub>3</sub> N),H <sub>2</sub> O | C <sub>55</sub> H <sub>75</sub> B N <sub>7.50</sub> O <sub>3</sub>                                              |
| Formula weight                                   | 520.35                                                                                                          | 692.53                                                                                                              | 900.53                                                                                                          |
| Temperature                                      | 100(2) K                                                                                                        | 295(2) K                                                                                                            | 100(2) K                                                                                                        |
| Wavelength                                       | 0.71073 Å                                                                                                       | 0.71073 Å                                                                                                           | 0.71073 Å                                                                                                       |
| Crystal system                                   | Triclinic                                                                                                       | Monoclinic                                                                                                          | Triclinic                                                                                                       |
| Space group                                      | P-1                                                                                                             | P2 <sub>1</sub> /c                                                                                                  | P-1                                                                                                             |
| Unit cell dimensions                             | a = 9.9278(5) Å<br>b = 14.8243(8) Å<br>c = 17.6465(10) Å<br>α = 104.209(3)°<br>β = 91.481(3)°<br>γ = 94.206(3)° | a = 12.1862(5) Å<br>b = 28.1636(12) Å<br>c = 10.6937(5) Å<br>α = 90°<br>β = 107.529(4)°<br>γ = 90°                  | a = 14.3032(13) Å<br>b = 14.3886(14) Å<br>c = 14.4404(14) Å<br>α = 93.878°<br>β = 113.614(4)°<br>γ = 90.966(5)° |
| Volume                                           | 2508.3(2) Å <sup>3</sup>                                                                                        | 3499.7(3) Å <sup>3</sup>                                                                                            | 2713.6(5) Å <sup>3</sup>                                                                                        |
| Z                                                | 4                                                                                                               | 4                                                                                                                   | 2                                                                                                               |
| Density (calculated)                             | 1.378 Mg/m <sup>3</sup>                                                                                         | 1.314 Mg/m <sup>3</sup>                                                                                             | 1.102 Mg/m <sup>3</sup>                                                                                         |
| Absorption coefficient                           | 0.094 mm <sup>-1</sup>                                                                                          | 0.093 mm <sup>-1</sup>                                                                                              | 0.069 mm <sup>-1</sup>                                                                                          |
| F(000)                                           | 1088                                                                                                            | 1456                                                                                                                | 974                                                                                                             |
| Crystal size (mm <sup>3</sup> )                  | 0.45 x 0.30 x 0.080                                                                                             | 0.32 x 0.12 x 0.09                                                                                                  | 0.45 x 0.20 x 0.17                                                                                              |
| Theta range for data collection                  | 1.613 to 28.359°                                                                                                | 3.75 to 28.75°                                                                                                      | 1.420 to 26.455°                                                                                                |
| Index ranges                                     | -13<=h<=13,<br>-19<=k<=19,<br>-23<=l<=23                                                                        | -16<=h<=12,<br>-28<=k<=38,<br>-10<=l<=14                                                                            | -17<=h<=16,<br>-17<=k<=17,<br>-14<=l<=18                                                                        |
| Reflections collected                            | 21795                                                                                                           | 19478                                                                                                               | 15200                                                                                                           |
| Independent reflections                          | 21795[R(int) = 0.0572]                                                                                          | 8402[R(int) = 0.0596]                                                                                               | 10400 [R(int) = 0.0513]                                                                                         |
| Completeness to theta = 25.000°                  | 99.3 %                                                                                                          | 96.7 %                                                                                                              | 94.3 %                                                                                                          |
| Data / restraints / parameters                   | 21795/7/727                                                                                                     | 8402/1/485                                                                                                          | 10400 / 105 / 672                                                                                               |
| Goodness-of-fit on F <sup>2</sup>                | 1.024                                                                                                           | 1.026                                                                                                               | 1.013                                                                                                           |
| Final R indices [I>2σ(I)]                        | R1 = 0.0650, wR2 = 0.1467                                                                                       | R1 = 0.0596, wR2 = 0.10896                                                                                          | R1 = 0.0704, wR2 = 0.1644                                                                                       |
| R indices (all data)                             | R1 = 0.1012, wR2 = 0.1665                                                                                       | R1 = 0.1089, wR2 = 0.1445                                                                                           | R1 = 0.1448,<br>wR2 = 0.2010                                                                                    |
| Largest diff. peak and hole (e.Å <sup>-3</sup> ) | 1.550, -0.462                                                                                                   | 0.194, -0.216                                                                                                       | 0.448, -0.283                                                                                                   |

| Parameters                                      | 9                                                                                                                 | 10                                                                                                               |
|-------------------------------------------------|-------------------------------------------------------------------------------------------------------------------|------------------------------------------------------------------------------------------------------------------|
| Empirical formula                               | C <sub>46</sub> H <sub>53</sub> B <sub>2</sub> N <sub>9</sub> O <sub>3</sub>                                      | C <sub>43</sub> H <sub>36</sub> BN <sub>7</sub> O <sub>4</sub>                                                   |
| Formula weight                                  | 801.59                                                                                                            | 725.60                                                                                                           |
| Temperature                                     | 100(2) K                                                                                                          | 100(2)K                                                                                                          |
| Wavelength                                      | 0.71073 Å                                                                                                         | 0.71073                                                                                                          |
| Crystal system                                  | Triclinic                                                                                                         | Triclinic                                                                                                        |
| Space group                                     | P-1                                                                                                               | P-1                                                                                                              |
| Unit cell dimensions                            | a = 13.9824(9) Å<br>b = 19.1267(12) Å<br>c = 20.5066(13) Å<br>α = 90.406(4)°<br>β = 108.715(3)°<br>γ = 90.449(3)° | a = 11.3918(7) Å<br>b = 11.9970 (8) Å<br>c = 13.9478 (8) Å<br>α = 75.157(3)°<br>β = 89.324(3)°<br>γ = 79.110(4)° |
| Volume                                          | 5193.8(6) Å <sup>3</sup>                                                                                          | 1808.1(2) Å <sup>3</sup>                                                                                         |
| Z                                               | 4                                                                                                                 | 2                                                                                                                |
| Density (calculated)                            | 1.025Mg/m <sup>3</sup>                                                                                            | 1.333 Mg/m <sup>3</sup>                                                                                          |
| Absorption coefficient                          | 0.065 mm <sup>-1</sup>                                                                                            | 0.087 mm <sup>-1</sup>                                                                                           |
| F(000)                                          | 1704                                                                                                              | 760                                                                                                              |
| Crystal size (mm <sup>3</sup> )                 | 0.29 x 0.15 x 0.10                                                                                                | 0.30 x 0.12 x 0.07                                                                                               |
| Theta range for data collection                 | 1.487 to 25.027°                                                                                                  | 1.511 to 28.399°                                                                                                 |
| Index ranges                                    | -16<=h<=16,<br>-22<=k<=22,<br>-24<=l<=24                                                                          | -15<=h<=15,<br>-16<=k<=15,<br>-18<=l<=18                                                                         |
| Reflections collected                           | 36644                                                                                                             | 17847                                                                                                            |
| Independent reflections                         | 18339[R(int) = 0.0348]                                                                                            | 8985 [R(int) = 0.0361]                                                                                           |
| Completeness to theta = 25.000°                 | 99.8 %                                                                                                            | 100.0 %                                                                                                          |
| Data / restraints / parameters                  | 18339 / 115 / 1096                                                                                                | 8985 / 0 / 505                                                                                                   |
| Goodness-of-fit on F <sup>2</sup>               | 1.047                                                                                                             | 1.030                                                                                                            |
| Final R indices [I>2sigma(I)]                   | R1 = 0.0682, wR2 = 0.1870                                                                                         | R1 = 0.0424, wR2 = 0.0989                                                                                        |
| R indices (all data)                            | R1 = 0.1011,<br>wR2 = 0.2119                                                                                      | R1 = 0.0675, wR2 = 0.1133                                                                                        |
| Largest diff. peak and hole (eÅ <sup>-3</sup> ) | 0.688, -0.404                                                                                                     | 0.314, -0.251                                                                                                    |

## Reference

1. M. J. Frisch, G. W. Trucks, H. B. Schlegel, G. E. Scuseria, M. A. Robb, J. R. Cheeseman, G. Scalmani, V. Barone, G. A. Petersson, H. Nakatsuji, Gaussian 16, Rev. C. 01, Gaussian, Inc., Wallingford, CT. 2016.
2. J. Jia and J. Wen, *Tetrahedron Lett.*, 2021, **71**, 153006.
3. H. Wang, X. Guo, W. Bu, Z. Kang, C. Yu, Q. Wu, L. Jiao and E. Hao, *Dyes Pigm.*, 2023, **210**, 111013.
4. M. M. Alcaide, F. M. Santos, V. n. F. Pais, J. I. s. Carvalho, D. Collado, E. Pérez-Inestrosa, J. s. F. Arteaga, F. Boscá, P. M. Gois and U. Pischel, *J. Org. Chem.*, 2017, **82**, 7151-7158.
5. F. M. Santos, Z. Domínguez, J. P. Fernandes, C. Parente Carvalho, D. Collado, E. Pérez-Inestrosa, M. V. Pinto, A. Fernandes, J. F. Arteaga and U. Pischel, *Chem. Eur. J.*, 2020, **26**, 14064-14069.
6. C. Yu, G. Di, Q. Li, X. Guo, L. Wang, Q. Gong, Y. Wei, Q. Zhao, L. Jiao and E. Hao, *Inorg. Chem.*, 2024, **63**, 21397-21409.
